1 **Crystal structures of Arabidopsis and Physcomitrella CR4 reveal the molecular architecture**  
2 **of CRINKLY4 receptor kinases.**

3

4 Authors: Satohiro Okuda<sup>1,\*</sup>, Ludwig A. Hothorn<sup>2,#</sup>, Michael Hothorn<sup>1,+</sup>

5

6 Affiliations:

7 <sup>1</sup>Structural Plant Biology Laboratory, Department of Botany and Plant Biology, University of  
8 Geneva, 1211 Geneva, Switzerland.

9 <sup>2</sup>Institute of Biostatistics, Leibniz University, 30167 Hannover, Germany.

10 \*present address: Department of Biological Science, School of Science, University of Tokyo, 113-  
11 0033 Tokyo, Japan.

12 #retired.

13 +To whom correspondence should be addressed: [michael.hothorn@unige.ch](mailto:michael.hothorn@unige.ch)

14

15 ORCIDs:

16 Satohiro Okuda: 0000-0001-6172-2515

17 Ludwig A. Hothorn 0000-0002-5162-1486

18 Michael Hothorn: 0000-0002-3597-5698

19 **Abstract**

20 **Plant-unique receptor kinases harbor conserved cytoplasmic kinase domains and sequence-**  
21 **diverse ectodomains. Here we report crystal structures of CRINKLY4-type ectodomains from**  
22 ***Arabidopsis* ACR4 and *Physcomitrella patens* PpCR4 at 1.95 Å and 2.70 Å resolution,**  
23 **respectively. Monomeric CRINKLY4 ectodomains harbor a N-terminal WD40 domain and a**  
24 **cysteine-rich domain (CRD) connected by a short linker. The WD40 domain forms a seven-**  
25 **bladed  $\beta$ -propeller with the N-terminal strand buried in its center. Each propeller blade is**  
26 **stabilized by a disulfide bond and contributes to the formation of a putative ligand binding**  
27 **groove. The CRD forms a  $\beta$ -sandwich structure stabilized by six disulfide bonds and shares**  
28 **low structural homology with tumor necrosis factor receptor domains. Quantitative binding**  
29 **assays reveal that ACR4 is not a direct receptor for the peptide hormone CLE40. An ACR4**  
30 **variant lacking the entire CRD can rescue the known *acr4-2* mutant phenotype, as can**  
31 **expression of PpCR4. Together, an evolutionary conserved signaling function for CRINKLY4**  
32 **receptor kinases is encoded in its WD40 domain.**

## 32 **Introduction**

33           Plants have evolved a unique set of membrane receptor kinases (RKs) that regulate diverse  
34 aspects of growth and development, form the first layer of the plant immune system and mediate  
35 symbiotic interactions. RKs contain a single membrane-spanning helix, a conserved dual-specificity  
36 cytoplasmic kinase domain and sequence-diverse extracellular domains (ectodomains) involved in  
37 signal perception and receptor activation<sup>1</sup>. The three-dimensional structures and functions of plant  
38 RKs with leucine-rich repeat (LRR) ectodomains have been characterized in detail, yielding a  
39 molecular understanding of their ligand binding and receptor activation mechanisms<sup>2</sup>.

40           Crystal structures of non-LRR RKs have been reported for lysine-motif domain containing  
41 immune and symbiosis receptors involved in the perception of N-acetyl-D-glucosamin-containing  
42 ligands<sup>3-5</sup>. S-locus receptor kinases involved in self recognition during flower pollination have been  
43 structurally characterized to contain  $\beta$ -barrel lectin domains and growth factor-like domains, all  
44 contributing to the specific recognition of a cysteine-rich signaling peptide<sup>6</sup>. Two other classes of  
45 RKs with lectin domain-containing extracellular domains have subsequently been characterized<sup>7</sup>:  
46 The CYSTEINE-RICH RECEPTOR-LIKE PROTEIN KINASES (CRKs) contain a tandem  
47 arrangement of DOMAIN OF UNKNOWN FUNCTION 26 (DUF26) lectin domains, which may  
48 be involved in the recognition of a carbohydrate ligand<sup>8</sup>. The *Catharanthus roseus* receptor kinase  
49 1-like (CrRLK1L) family contains a tandem arrangement of malectin domains<sup>9</sup> involved in the  
50 sensing of cysteine-rich RAPID ALKALINIZATION FACTOR peptides<sup>10</sup>, which can be distinctly  
51 bound to either LORELEI-like GLYCOLPHOSPHATIDYLINOSITOL (GPI)-ANCHORED  
52 PROTEINS<sup>10</sup> or to the LRR domains of extensins<sup>11</sup>.

53           Plant-unique CRINKLY4 (CR4) -type RKs show an unusual ectodomain structure radically  
54 different from the known LRR, LysM and lectin receptor kinases described above. The founding  
55 member of this family was identified by mapping the *crinkly4* mutation affecting leaf epidermis  
56 differentiation in maize<sup>12</sup>. The putative receptor kinase CR4 was initially shown to contain an active  
57 cytoplasmic protein kinase module as well as an ectodomain with distant sequence homology to  
58 tumor necrosis factor receptor (TNFR) domains<sup>12,13</sup>. TNFR type I and II receptors contain a  
59 cysteine-rich ectodomain that folds into several ~40 amino-acid segments. Each segment contains 6  
60 conserved cysteines engaged in disulfide bonds<sup>14</sup> and can act as binding sites for growth factors<sup>15</sup>.  
61 The sequence similarities between the CRINKLY4 and TNFR ectodomains suggested a role for  
62 maize CR4 in growth factor-triggered cell differentiation responses<sup>13,16</sup>. Anti-sense knock-down or  
63 insertion mutation-based knock-out of *ACR4*, the Arabidopsis ortholog of maize CR4, again  
64 resulted in epidermis differentiation defects, leading to, for example, abnormal embryo and seed  
65 development<sup>17-19</sup>. *ACR4* localizes to the plasma membrane and to endosomes<sup>17-20</sup> and is a

66 catalytically active protein kinase<sup>18,21–23</sup>. Sequence analysis of four ACR4 homologs in Arabidopsis  
67 indicated the presence of a conserved N-terminal  $\beta$ -propeller structure in CRINKLY4  
68 ectodomains<sup>21</sup>. Subsequent structure-function studies revealed that kinase null mutations as well as  
69 deletion of the putative TNFR domain complemented the *acr4-2* null mutant phenotype<sup>18,20,24,25</sup>. In  
70 contrast, partial deletion of the putative  $\beta$ -propeller domain or mutation of the conserved Cys180 in  
71 the  $\beta$ -propeller to tyrosine could not rescue the *acr4-2* phenotype<sup>20,26</sup>, suggesting an important  
72 functional role for the N-terminal segment of the ACR4 ectodomain.

73  $\beta$ -propeller domains are often involved in protein – ligand or protein – protein interactions<sup>27</sup>  
74 and thus different interaction partners for ACR4 ectodomain have been proposed, following the  
75 identification of root specific functions for ACR4<sup>28,29</sup>. Specifically, the plant peptide hormone  
76 CLAVATA3/ESR-RELATED 40 (CLE40) controls expression of the transcription factor  
77 WUSCHEL RELATED HOMEBOX 5 (WOX5) to regulate root stem cell proliferation<sup>29</sup>. CLE40's  
78 signaling capacity depends on the presence of ACR4 and ACR4 has been proposed to act as a direct  
79 receptor for CLE40 in the root<sup>29–31</sup>. Moreover, ACR4 has been reported to physically interact with  
80 the CLAVATA3 (CLV3) / CLE peptide receptor CLAVATA1 (CLV1), forming heteromeric  
81 complexes at the plasma-membrane<sup>32</sup>. In the same study, ACR4 homo-oligomers were observed<sup>32</sup>.  
82 PROTEIN PHOSPHATASE 2A-3 (PP2A-3) and WOX5 have been identified as direct interaction  
83 partners for the ACR4 cytoplasmic domain<sup>33,34</sup>. Here, we uncover the architecture of plant-unique  
84 CRINKLY4 RKs by solving crystal structures of ACR4 and *Physcomitrella patens*<sup>35</sup> PpCR4.

85

## 86 Results

87 For protein X-ray crystallographic analysis, we produced the ectodomains of ACR4  
88 (ACR4<sup>WD40-CRD</sup>, residues 1 – 423) and PpCR4 (PpCR4<sup>WD40-CRD</sup>, residues 1 – 405), the isolated  $\beta$ -  
89 propeller domain of ACR4 (ACR4<sup>WD40</sup>, residues 1 – 334) and the kinase domain of ACR4  
90 (ACR4<sup>kinase</sup>, residues 497 – 792) by secreted and cytoplasmic expression in insect cells, respectively.  
91 (see Methods) (Fig. 1a). All proteins were purified to homogeneity and the autophosphorylation  
92 activity of ACR4<sup>kinase</sup> could be confirmed (Fig. 1b,c). No crystals were obtained for ACR4<sup>kinase</sup> and  
93 initial crystals of ACR4<sup>WD40-CRD</sup> and ACR4<sup>WD40</sup> diffracted poorly. Enzymatic deglycosylation of  
94 ACR4<sup>WD40</sup> yielded a new crystal form diffracting to 1.95 Å resolution. The structure was determined  
95 using the multiple anomalous dispersion method on a single crystal derivatized with a platinum  
96 compound (see Methods, Supplementary Table 1). Next, enzymatic deglycosylation of PpCR4<sup>WD40-</sup>  
97 <sup>CRD</sup> yielded crystals diffracting to 2.7 Å resolution, enabling us to trace the entire CRINKLY4  
98 ectodomain (Supplementary Table 1).

99 The N-terminal  $\beta$ -propeller domain of ACR4 and PpCR4 folded into a seven-bladed WD40  
100 domain<sup>27</sup> (Fig. 1d), as previously speculated<sup>20</sup>. Each blade is stabilized by a highly conserved  
101 disulfide bridge and connected by small loop regions, possibly an evolutionary adaptation to the  
102 extracellular environment (Fig. 1d, Supplementary Fig. 1). Cys180, which is found mutated to  
103 tyrosine in the *acr4-7* mutant<sup>20</sup>, forms a disulfide bond in the 4<sup>th</sup> blade (Fig. 1d). The N- and C-  
104 terminal blades are not connected by disulfide bonds (Fig. 1d). The most N-terminal  $\beta$ -strand is  
105 buried in the center of the propeller and is highly conserved among all known CRINKLY4  
106 receptors<sup>36</sup> (Fig. 1d, Supplementary Fig. 1). Several small loops connecting the different blades of  
107 the WD40 domain appear partially disordered in our ACR4 and PpCR4 structures (Fig. 1d,e).

108 The C-terminal CRD comprises PpCR4 residues 313-401 and folds into a well defined  $\beta$ -  
109 sandwich structure stabilized by six invariant disulfide bridges (Fig. 1e, Supplementary Fig. 1, see  
110 below). The WD40 and CRD domains are connected by a short linker region (Fig. 1e). Analysis of  
111 crystal lattice arrangements with the program PISA<sup>37</sup> and analytical size-exclusion chromatography  
112 experiments (Supplementary Fig. 2) together indicate that the ACR4 and PpCR4 ectodomains  
113 behave as monomers in solution. All surface exposed cysteines in ACR4 and PpCR4 contribute to  
114 disulfide bond formation (Fig. 1d,e; Supplementary Fig. 1). The N-glycosylation pattern differs  
115 between ACR4 and PpCR4 (Fig. 1e, Supplementary Fig. 1). Taken together, a compact WD40 and a  
116 cysteine-rich domain represent structural fingerprints of monomeric CRINKLY4 ectodomains.

117 Structural homology searches against ACR4<sup>WD40</sup> using the program DALI<sup>38</sup> returned the  
118 extracellular WD40 domain of the secreted  $\beta$ -lactamase inhibitor protein II BLIP-II from the soil  
119 bacterium *Streptomyces exfoliatus* as top hit (DALI Z-score 23.2, root mean square deviation  
120 [r.m.s.d.] is  $\sim 2.2$  Å comparing 192 corresponding C $_{\alpha}$  atoms) (Supplementary Fig. 3)<sup>39</sup>. A previously  
121 reported homology model of ACR4<sup>WD40</sup> had been based on the BLIP-II structure<sup>20</sup>. The UV-B  
122 photoreceptor UV-B – RESISTANCE 8 (UVR8) represents the closest structural homolog in plants  
123 (Dali Z-score 22.1, r.m.s.d. is  $\sim 2.4$  Å comparing 218 corresponding C $_{\alpha}$  atoms) (Supplementary  
124 Fig.3)<sup>40</sup>. ACR4<sup>WD40</sup> however lacks the UVR8 tryptophan cage involved in UV-B light sensing<sup>40,41</sup>  
125 and both BLIP-II and UVR8 are devoid of the buried N-terminal strand and the conserved disulfide  
126 bridge pattern present in ACR4<sup>WD40</sup>. Thus, the pore-filling N-terminus and the invariant blade  
127 disulfide bonds are unique structural features of extracellular CRINKLY4 WD40 domains.

128 We next studied the interaction of ACR4<sup>WD40-CRD</sup> with its proposed ligand CLE40<sup>29-32</sup>. As  
129 ACR4 has been previously reported to form hetero-oligomers with the LRR-RK CLV1, we sought  
130 to include the CLV1 ectodomain in these experiments, but we could not produce well-behaving  
131 protein samples of the AtCLV1 ectodomain by secreted expression in insect cells (Supplementary  
132 Fig. 4), and consequently could not use the CLV1 ectodomain for biochemical or crystallographic

133 experiments. We thus replaced CLV1 with the LRR ectodomain of the sequence-related CLE  
134 peptide receptor BARELY ANY MERISTEM (BAM1) in our *in vitro* binding experiments (Fig. 2a).  
135 We found that CLE40 binds the AtBAM1 ectodomain with a dissociation constant ( $K_d$ ) of  $\sim 1 \mu\text{M}$   
136 (Fig. 2b) but shows no detectable binding to the ACR4 ectodomain in quantitative grating-coupled  
137 interferometry (Fig. 2b) and isothermal titration calorimetry (Fig. 2c) assays. Thus, CLE40 does not  
138 represent a direct ligand for the ACR4 ectodomain.

139 Using the previously documented seed retardation phenotype of the *acr4-2* mutant<sup>18,20</sup> we  
140 next carried out genetic complementation analyses using different constructs expressed from the  
141 *ACR4* promoter. In agreement with an earlier report<sup>20</sup>, a construct in which the entire cytoplasmic  
142 domain of ACR4 had been deleted could not rescue the seed development phenotypes of *acr4-2*  
143 plants (Fig. 3a). Full-length ACR4 lacking kinase activity partially restored seed development in  
144 *acr4-2* plants (Fig. 3a). Strikingly, expression of full-length PpCR4, the ectodomain of which shares  
145 only 40% sequence identity at the amino-acid level with ACR4<sup>WD40-CRD</sup>, from the *ACR4* promoter  
146 could partially complement *acr4-2* phenotypes as well. Together, these experiments reinforce an  
147 evolutionary conserved function for CRINKLY4 RKs, which are however not strictly dependent on  
148 the protein kinase activity of the receptor.

149 The 2.7 Å crystal structure of the entire ectodomain from PpCR4 enabled us to further  
150 characterize the  $\sim 90$  amino-acid CRINKLY4 CRD (Fig. 3b). A structural homology search with  
151 DALI<sup>38</sup> indeed identified several TNFR domains as top hits, but with very low DALI Z-scores (4.1-  
152 2.9). Structural superposition of PpCR4<sup>CRD</sup> with the previously reported structure of a type I TNF  
153 receptor extracellular domain revealed that only a small portion of the CRINKLY4 aligns with  
154 canonical TNFR domains (r.m.s.d. is  $\sim 1$  Å comparing 20 corresponding C $\alpha$  atoms, Fig. 3b). The  
155 segment includes a small  $\beta$ -hairpin and two conserved disulfide bridges located at the center of the  
156 CRINKLY4 CRD (Fig. 3c). Structural superposition of the eight molecules in the asymmetric unit  
157 of our PpCR4<sup>WD40-CRD</sup> crystal structure (Supplementary Table 1) revealed only subtle movements of  
158 the CRD versus the WD40 domain (r.m.s.d. is  $\sim 0.3$ - $0.5$  Å comparing 360 corresponding C $\alpha$  atoms,  
159 Supplementary Fig. 5). In line with this, we located a small WD40 – CRD domain interface using  
160 PISA<sup>37</sup> (total buried surface area is  $\sim 900$  Å<sup>2</sup>). The interface is formed by the C-terminus of the CRD  
161 (PpCR4 residues 385-401) that makes mainly hydrophobic interactions with a small groove located  
162 between the N- and C-terminal blade of the WD40 domain (Supplementary Fig. 6). Additional  
163 contacts originate from a small  $\alpha$ -helix in the CRD and several loop regions in PpCR4<sup>WD40</sup>  
164 (Supplementary Fig. 6).

165 Using the now experimentally determined domain boundaries of the ACR4 CRD  
166 (Supplementary Figs. 7 and 1), we re-performed complementation assays of the *acr4-2* mutant with

167 a construct in which the entire CRD was omitted (ACR4  $\Delta$ CRD). As previously reported<sup>20,24</sup>, we  
168 found that ACR4  $\Delta$ CRD can rescue the seed development phenotype of *acr4-2* plants (Fig. 3a).  
169 Recently, mutation of the cysteine residues in ACR4<sup>WD40</sup> and ACR4<sup>CRD</sup> involved in the formation of  
170 disulfide bonds in our structures (Fig.1, 3b,c) to alanine resulted in a functional receptor for seed  
171 development<sup>24</sup>. We monitored migration of the purified ACR4<sup>WD40-CRD</sup> ectodomain under oxidizing  
172 and strongly reducing conditions in analytical size exclusion chromatography experiments and  
173 found that reduction of ACR4<sup>WD40-CRD</sup> did not induce aggregation of the receptor (Fig. 3d,e).  
174 Together, the CRINKLY4 CRD only shares weak structural homology with animal TNFR domains,  
175 has a conserved domain interface with the WD40 domain and is dispensable for seed development.  
176 The conserved disulfide bonds appear to be involved in structural stabilization. The domain  
177 interface between the WD40 domain and the CRD is conserved among CRINKLY4 receptors from  
178 different species (Supplementary Figs. 1, 6).

179 While the CRD domain appears to be dispensable for at least some of ACR4's physiological  
180 functions, our and previous findings<sup>20,24</sup> argue for an important role of the structurally unique WD40  
181 domain in CRINKLY4 receptors. We located evolutionary conserved, surface exposed residues at  
182 the 'back side' of the ACR4 WD40 domain (Fig. 4a, Supplementary Fig. 1), which in our  
183 PpCR4<sup>WD40-CRD</sup> structure is in contact with the CRD (Fig. 1e). We replaced individual residues by  
184 alanine or glutamine, respectively and assessed the ability of the resulting mutant proteins to  
185 complement the *acr4-2* seed development phenotype (Fig. 4a-c). We analyzed three independent  
186 homozygous T3 lines per mutant receptor and found that most mutations behaved similar to wild  
187 type (Fig. 4b) and that none of mutants tested displayed the strong loss-of-function phenotype of  
188 *acr4-2* plants (Fig. 4b,c). Plants in which either Tyr157 or Asn158/Asn196 were mutated had seed  
189 numbers per silique that were significantly reduced compared to wild type (Fig. 4b). While there  
190 was no electron density for a N-glycan at position Asn158 in the ACR4<sup>WD40</sup> structure (see Methods),  
191 the corresponding Asn150 in PpCR4 was found glycosylated (Fig. 1e). ACR4 Asn196 is predicted  
192 to be N-glycosylated as well<sup>42</sup>, suggesting that the weak loss-of-function phenotypes observed in  
193 our Tyr157/Asn158 and Asn196 point mutants may be caused by an altered N-glycosylation pattern  
194 of the receptor (Fig. 4b,c).

195 We next analyzed the molecular surface of the 'front side' of ACR4<sup>WD40</sup>, which represents  
196 another canonical binding surface for peptide and protein ligands in many cytoplasmic or nuclear  
197 localized WD40 proteins<sup>27</sup>. We located a large binding groove in ACR4<sup>WD40</sup> formed by the WD40  
198 domain core and by small surrounding loop regions, which appear similar in our ACR4<sup>WD40</sup> and  
199 PpCR4<sup>WD40-CRD</sup> WD40 domain structures (r.m.s.d. is  $\sim 1.4$  Å comparing 246 corresponding C $_{\alpha}$  atoms,  
200 Supplementary Fig. 7). The very low degree of sequence surface conservation in the putative

201 binding groove in apo ACR4<sup>WD40</sup> renders mutational analysis of the full-length receptor *in planta*  
202 difficult (Supplementary Figs. 1, 8). The binding groove is however larger and deeper compared to  
203 the VP-peptide binding site in the structurally related WD40 domain of the light-signaling E3  
204 ubiquitin ligase CONSTITUTIVELY PHOTOMORPHOGENIC 1 (COP1) (Fig. 4d)<sup>43</sup>. It may thus  
205 provide an interaction platform for high molecular weight ligand.

206

## 207 Discussion

208 Our crystal structures (Fig. 1d,e) and reverse genetic analyses (Fig. 3a) together reveal an  
209 evolutionary conserved domain architecture for plant-unique CRINKLY4 receptor kinases<sup>36</sup>. The  
210 CRINKLY4 WD40 domain differs from known cytoplasmic and extracellular WD40  
211 domains<sup>27,39,40,43</sup>, with its seven blades being stabilized by disulfide bridges and the hydrophobic core  
212 of the domain being reinforced by insertion of the protein's N-terminus (Fig. 1d,e). We speculate  
213 that these unique structural features represent an adaptation to CRINKLY4 ectodomains being  
214 exposed to the plant cell wall environment. Previous<sup>20</sup> and our genetic data argue for an important  
215 function for the ACR4 WD40 domain in seed development (Fig. 3a). A large groove located on the  
216 'front side' of ACR4 may be involved in the binding of a ligand (Fig. 4d). This ligand could be a  
217 small molecule, a protein or a peptide, and may be larger than the octameric peptide motifs  
218 recognized by COP1 (Fig. 4d). The low degree of sequence conservation of residues contributing to  
219 the formation of the binding groove in the WD40 domain (Fig. 4d, Supplementary Fig. 1) and the  
220 fact that PpCR4 can functionally replace ACR4's function in Arabidopsis seed development (Fig.  
221 3a) together indicate that CRINKLY4 receptors may sense a family of structurally conserved  
222 ligands.

223 Our quantitative binding assays reveal that the previously proposed peptide ligand CLE40  
224 cannot directly interact with the ACR4 ectodomain (Fig. 2), but we cannot rule out that CLE40  
225 binds the CLV1 ectodomain in a signaling complex also containing ACR4<sup>29,30,32</sup>. The architecture  
226 and cellular functions of CLV1 – ACR4 signaling complexes remain to be elucidated, with  
227 recombinant expression and purification of the CLV1 ectodomain representing a significant  
228 challenge (Supplementary Fig. 4). BAM1 cannot fully replace CLV1 in quantitative biochemical  
229 assays, as it binds CLE40 only with moderate affinity (Fig. 2). In contrast, the CLE family member  
230 CLE9 binds BAM1 with nanomolar affinity<sup>44,45</sup>. In solution and in the absence of ligand,  
231 CRINKLY4 ectodomains behave as monomers (Fig. 3e, Supplementary Fig. 2). The previously  
232 observed ACR4 homo-oligomers<sup>32</sup> may thus be generated by ligand-induced oligomerisation of  
233 several CRINKLY4 ectodomains and/or be stabilized by interaction of the CRINKLY4 trans-  
234 membrane helices, as previously suggested<sup>46,47</sup>.



235 Analysis of the CRINKLY4 cysteine-rich domain revealed only weak structural homology  
236 with animal TNFR domains (Fig. 3b)<sup>14</sup>. In line with this, we could not locate proteins with  
237 homology to tumor necrosis factors in the *Arabidopsis* or *Physcomitrella patens* genomes<sup>48,49</sup>. The  
238 CRINKLY4 CRD contains six conserved disulfide bridges (Fig. 1e, Supplementary Fig. 1), which  
239 in our PpCR4<sup>WD40-CRD</sup> structure appear to be involved in structural stabilization (Fig. 3b,c). However,  
240 CRINKLY4 ectodomains can withstand reducing conditions (Fig. 3e), and thus the putative  
241 function of the CRD could indeed be regulated by changes in the cell wall redox environment<sup>24</sup>.

242 Enzymatic assays of the CRINKLY4 cytoplasmic domains obtained from prokaryotic<sup>18,21-23</sup>  
243 or eukaryotic expression hosts (Fig. 1b,c) clearly identify CRINKLY4s as active protein kinases.  
244 Our and previous<sup>20</sup> reverse genetic experiments suggest that the ACR4 cytoplasmic domain has to  
245 be present for normal seed development in *Arabidopsis*, yet its catalytic activity seems to be  
246 dispensable (Fig 1e). Similar observations have been made for CrRLK1L-family receptor kinases<sup>50-</sup>  
247 <sup>52</sup>. The mechanistic implications are poorly understood, but the involvement of protein phosphatases  
248 in both CR4 and CrRLK1L-mediated signal transduction<sup>33,53,54</sup> suggests that the cytoplasmic kinases  
249 domains of these receptors may act as scaffolding proteins that can become phosphorylated despite  
250 not requiring auto- and trans-phosphorylation activity themselves.

251 Genetic interactions between ACR4 and other receptor kinases such as ABNORMAL LEAF  
252 SHAPE 2 (ALE2)<sup>55</sup> the LRR-RKs CLV1<sup>29,30,32</sup> and GSO1/GSO2<sup>45,56</sup> have so far not yielded a  
253 mechanistic understanding of CRINKLY4's signaling functions. Also, no ligand candidate for  
254 ACR4 or for its homologs in *Arabidopsis* has emerged from forward genetic screens<sup>21</sup>. Our  
255 identification of a putative ligand binding pocket in ACR4<sup>WD40</sup> now reinforces the notion that *bona*  
256 *fide* ligands for CR4s may exist and that their identification may be achieved using a combination of  
257 genetic and biochemical approaches.

258

## 259 **Material and Methods**

### 260 **Protein expression and purification**

261 ACR4 coding sequences for the WD40 domain (residues 1 – 334) and its entire ectodomain  
262 (residues 1 – 423) were amplified from *A. thaliana* cDNA. PpCR4<sup>WD40-CRD</sup> (residues 1 – 405),  
263 AtCLV1 (residues 25 – 621) and BAM1 (residues 20 – 637) were synthesized by Geneart  
264 (Germany) with codon usage optimized for expression in *Trichoplusia ni*. The constructs of ACR4  
265 and PpCR4 were cloned in a modified pFastBac vector (Geneva Biotech), containing a TEV  
266 (tobacco etch virus protease) cleavable C-terminal StrepII – 9x His tag. ACR4<sup>WD40-CRD</sup>, CLV1 and  
267 BAM1 were also cloned into the vector holding a native signal peptide or the *Drosophila*  
268 *melanogaster* BiP secretion signal peptide, respectively, a C-terminal TEV cleavable StrepII – 10x

269 His tag and a non-cleavable Avi-tag<sup>57,58</sup>. *Trichoplusia ni* (strain Tnao38) cells<sup>59</sup> were infected with a  
270 multiplicity of infection (MOI) of 1 at a density of  $2 \times 10^6$  cells ml<sup>-1</sup> and incubated 26h at 28 °C and  
271 48h at 22 °C. The secreted protein was purified from the supernatant by Ni<sup>2+</sup> affinity  
272 chromatography on a HisTrap Excel column (GE healthcare), equilibrated in 50 mM KP<sub>i</sub> pH 7.6,  
273 250 mM NaCl, 1 mM 2-Mercaptoethanol, followed by StrepII affinity chromatography on a Strep-  
274 Tactin XT Superflow high affinity column (IBA), equilibrated in 20 mM Tris pH 8.0, 250 mM  
275 NaCl, 1 mM EDTA. The tag was cleaved with His-tagged TEV protease at 4 °C overnight and  
276 removed by a second Ni<sup>2+</sup> affinity chromatography step. Proteins were then further purified by size-  
277 exclusion chromatography on either a Superdex 200 increase 10/300 GL, Hi Load 16/600 Superdex  
278 200 pg, or a HiLoad 26/600 pg column (GE Healthcare), equilibrated in 20 mM HEPES pH 7.5,  
279 150 mM NaCl. For crystallization, ACR4<sup>WD40</sup> and PpCR4<sup>WD40-CRD</sup> were dialyzed in 20 mM sodium  
280 citrate pH 5.0, 150 mM NaCl and treated with Endoglycosidase H, F1, and F3 to cleave sugar  
281 chains. Proteins were then purified by ion exchange chromatography on a HiTrapSP HP column  
282 (GE Healthcare), equilibrated in 20 mM Citrate pH 5.0, 25 mM NaCl for ACR4<sup>WD40</sup> or 20 mM  
283 Citrate pH 3.5, 25 mM NaCl for PpCR4<sup>WD40-CRD</sup>, respectively. Fractions were pooled, concentrated  
284 and further purified by size-exclusion chromatography.

285

### 286 ***In vitro* kinase phosphorylation assay**

287 Coding sequence of ACR4 kinase domain (residues 497 – 792) was amplified from *A.*  
288 *thaliana* cDNA and cloned in a modified pFastBac vector harboring a TEV cleavable N-terminal  
289 maltose binding protein (MBP) – StrepII – 10x His tag. Point mutation was introduced into the  
290 ACR4 (Asp659 → Asn; hereafter ACR4<sup>D659N</sup>, Supplementary Table 2) coding sequence using the  
291 primer extension method for site-directed mutagenesis, rendering the kinase inactive<sup>60</sup>. Insect cells  
292 were infected with a MOI of 1 at a density of  $2 \times 10^6$  cells ml<sup>-1</sup> and incubated 26h at 28 °C and 48h  
293 at 22 °C. Cells were pelleted by centrifugation at 4,000 x g, 4 °C for 15 min and resuspended in  
294 buffer A (20 mM HEPES pH 7.5, 500 mM NaCl, 4 mM MgCl<sub>2</sub> and 2 mM 2-Mercaptoethanol)  
295 supplemented with 50 µg ml<sup>-1</sup> DNase I, 10 %(v/v) glycerol and 1 tablet of protease inhibitor  
296 cocktail (cOmplete, Roche), followed by sonication. The cell lysate was centrifuged at 35,000 x g, 4  
297 °C for 60 min and the protein was purified from the supernatant by Ni<sup>2+</sup> affinity chromatography  
298 with buffer A, followed by StrepII affinity chromatography. For ACR4<sup>D659N</sup>, the 10x His – StrepII –  
299 MBP tag was cleaved with His-tagged TEV protease at 4 °C overnight and removed by Ni<sup>2+</sup> affinity  
300 chromatography. Proteins were then further purified by size-exclusion chromatography on a  
301 Superdex 200 increase 10/300 GL column equilibrated in 20 mM Tris-HCl pH 8, 250 mM NaCl, 4  
302 mM MgCl<sub>2</sub> and 0.5 mM TCEP. Monomeric peak fractions were collected and concentrated for

303 analyses. For *in vitro* kinase assays, 2  $\mu\text{g}$  of MBP-ACR4 and 1  $\mu\text{g}$  of ACR4<sup>D659N</sup> were used in a  
304 reaction volume of 20  $\mu\text{l}$ . The reactions were started by addition of 5  $\mu\text{Ci}$  [ $\gamma$ -<sup>32</sup>P]-ATP (Perkin-  
305 Elmer, Waltham, MA), incubated at room temperature for 45 min and terminated by the addition of  
306 6x SDS loading dye, immediately followed by heating the samples at 95 °C. Proteins were  
307 separated by SDS-PAGE in 4 – 15 % gradient gels (TGX, Biorad) and <sup>32</sup>P-derived signals were  
308 visualized by exposing the gel to an X-ray film (SuperRX, Fujifilm).

309

### 310 **Crystallization and data collection**

311 Crystals of the deglycosylated ACR4<sup>WD40</sup> and PpCR4<sup>WD40-CRD</sup> developed at room temperature  
312 in hanging drops composed of 1  $\mu\text{l}$  protein solution (ACR4<sup>WD40</sup>, 20 mg/ml; PpCR4<sup>WD40-CRD</sup>, 16  
313 mg/ml) 1  $\mu\text{l}$  of crystallization buffer (16 % PEG 6,000, 0.01 M tri-sodium citrate pH 5.0 for  
314 ACR4<sup>WD40</sup>; 15 % PEG 4,000, 0.2 M imidazole malate pH 7.0 in the case of PpCR4<sup>WD40-CRD</sup>)  
315 suspended above 1.0 ml of the latter as reservoir solution and using microseeding protocols.  
316 Crystals were cryo-protected by serial transfer into crystallization buffer supplemented with 20 %  
317 (v/v) ethylene glycol and snap-frozen in liquid nitrogen. For heavy-atom derivatization, crystals of  
318 ACR4<sup>WD40</sup> were transferred in the crystallization buffer containing 2 mM K<sub>2</sub>[Pt(CNS)<sub>6</sub>] and  
319 incubated for 2.5h. Crystals were cryo-protected by serial transfer into crystallization buffer  
320 supplemented with 20 % (v/v) glycerol and cryo-cooled in liquid nitrogen. Platinum multi-  
321 wavelength anomalous diffraction (MAD) data were collected to 3.2 Å resolution was collected at  
322 beam-line PXIII at the Swiss Light Source (SLS), Villigen, CH. A native data for ACR4<sup>WD40</sup> and  
323 PpCR4<sup>WD40-CRD</sup> were recorded at a resolution of 1.95 Å and 2.70 Å, respectively (Supplementary  
324 Table 1). Data processing and scaling were done with XDS and XSCALE<sup>61</sup>.

325

### 326 **Structure solution and refinement**

327 Nine consistent Pt sites were located in three wavelength MAD data using the program  
328 SHELXD<sup>62</sup> followed by site refinement and phasing in SHARP<sup>63</sup>. The resulting heavy atom sites  
329 and starting phases (FOM was 0.35 to 3.2 Å resolution) were input into phenix.autobuild<sup>64</sup> for non-  
330 crystallographic symmetry (NCS) averaging, phase extension, density modification (FOM was 0.75  
331 to 1.95 Å resolution) and iterative model building. The refined (Refmac5<sup>65</sup>) model comprises four  
332 ACR4<sup>WD40</sup> molecules in the asymmetric unit with an associated solvent content of 0.42. The space  
333 group  $P 2_1$  with a  $\beta$  angle of 90.1° was validated using the programs POINTLESS<sup>66</sup> and  
334 ZANUDA<sup>67</sup>. The structure of PpCR4<sup>WD40-CRD</sup> was solved using the molecular replacement method  
335 using an ACR4<sup>WD40</sup> monomer as search model in calculations with the program PHASER<sup>68</sup>. The  
336 solution comprises eight PpCR4<sup>WD40-CRD</sup> molecules in the asymmetric unit. The structure was

337 completed in alternating cycles of manual model building in COOT<sup>69</sup> and restrained NCS  
338 refinement in phenix.refine<sup>70</sup>. Ile156 represents a Ramachandran plot outlier in each chain, but is  
339 well defined by electron density. Structural diagrams were prepared in Pymol  
340 (<https://sourceforge.net/projects/pymol/>) and ChimeraX<sup>71</sup>.

341

### 342 **Biotinylation of proteins**

343 The respective proteins (20 – 100  $\mu\text{M}$ ) were biotinylated with biotin ligase BirA<sup>58</sup> (2  $\mu\text{M}$ )  
344 for 1h at 25 °C, in a volume of 200  $\mu\text{l}$ ; 25 mM Tris pH 8, 150 mM NaCl, 5 mM MgCl<sub>2</sub>, 2 mM 2-  
345 Mercaptoethanol, 0.15 mM Biotin, 2 mM ATP, followed by size-exclusion chromatography to  
346 purify the biotinylated proteins.

347

### 348 **Grating – coupled interferometry**

349 GCI experiments were performed with the Creoptix WAVE system (Creoptix AG,  
350 Switzerland), using 4PCP WAVE chips (thin quasiplanar polycarboxylate surface; Creoptix,  
351 Switzerland). Chips were conditioned with borate buffer (100 mM sodium borate pH 9.0, 1 M  
352 NaCl; Xantec, Germany) and activated with 1:1 mix of 400 mM *N*-(3-dimethylaminopropyl)-*N'*-  
353 ethylcarbodiimide hydrochloride and 100 mM *N*-hydroxysuccinimide (Xantec, Germany) for 7 min.  
354 Streptavidin (50  $\mu\text{g ml}^{-1}$ ; Sigma, Germany) in 10 mM sodium acetate pH 5.0 (Sigma, Germany) was  
355 immobilized on the chip surfaces and passivated with 0.5 % BSA (Roche, Switzerland) in 10 mM  
356 sodium acetate pH 5.0, followed by final quenching with 1M ethanolamine pH 8.0 (Xantec,  
357 Germany) for 7 min. Biotinylated ligands (20 – 50  $\mu\text{g ml}^{-1}$ ) was captured by streptavidin  
358 immobilized on the chip surface. All kinetic analyses were performed at 25°C with a 1:2 dilution  
359 series from 10  $\mu\text{M}$  of CLE40 peptides in 20 mM citrate pH 5.0, 250 mM NaCl, 0.01 % Tween 20.  
360 Blank injections were used for double referencing and a dimethylsulfoxide (DMSO) calibration  
361 curve for bulk correction. Analysis and correction of the obtained data was performed using the  
362 Creoptix WAVE control software (correction applied: X and Y offset; DMSO calibration; double  
363 referencing). Mass transport binding models with bulk correction were used. Experiments were  
364 performed in triplicates.

365

### 366 **Isothermal titration calorimetry**

367 All ITC experiments were performed on a MicroCal PEAQ-ITC (Malvern Panalytical) with  
368 a 200  $\mu\text{l}$  sample cell and a 40  $\mu\text{l}$  injection syringe at 25 °C. Proteins were dialyzed into ITC buffer  
369 (20 mM sodium citrate pH 5.0, 250 mM NaCl) prior to all experiments. The CLE40 peptide  
370 (RQV[Hyp]TGSDPLHH) was synthesized (Peptide Specialty Labs GmbH) and dissolved directly

371 in buffer. The dissolved peptide concentration was measured by right-angle light scattering  
372 (OMNISEC RESOLVE / REVEAL combined system, Malvern Panalytical). The protein  
373 concentrations were calculated based on their absorbance at 280 nm and their corresponding molar  
374 extinction coefficient. A typical experiment consisted of injecting 19 injections of 2  $\mu$ l of 1000  $\mu$ M  
375 CLE40 into the cell containing 100  $\mu$ M ACR4. Experiments were performed in triplicates.

376

### 377 **Plant materials and generation of transgenic lines**

378 *Arabidopsis thaliana* ecotype Columbia (Col-0) and SAIL\_240\_B04 (*acr4-2*<sup>18</sup>) were used  
379 for all experiments. *ACR4* gene (residues 1 – 895) and *ACR4* promoter region (*pACR4*, 1847 bp  
380 upstream from ATG) were amplified from *A. thaliana* genomic DNA. *PpCR4* (residues 1 – 893)  
381 gene with *Physcomitrella patens* CDS was synthesized (Geneart, Germany). The coding sequences  
382 were cloned in a pDONR 221 Gateway vector (Invitrogen) and *pACR4* sequence was cloned in a  
383 pDONR P4-P1R Gateway vector (Invitrogen). *ACR4* variants carrying deletion or point mutations  
384 were generated using the primer extension method. pDONR P2R-P3 Gateway vector harboring  
385 mCitrine or 6x HA tag were used to attach C-terminal tag. Expression constructs were generated  
386 with LR Gateway Cloning (Invitrogen) in pH7m34GW<sup>72</sup>; *pACR4::ACR4* (residues 1 – 895)-  
387 mCitrine, *pACR4::ACR4\_ΔCyto* (residues 1 – 492)-mCitrine, *pACR4::PpCR4* (residues 1 – 893)-  
388 mCitrine, *pACR4::ACR4\_ΔCRD* (residues 1 – 895 with deletion 335 – 423)-mCitrine,  
389 *pACR4::ACR4\_K540R-HA*, *pACR4::ACR4\_D84A-mCitrine*, *pACR4::ACR4\_F105A-mCitrine*,  
390 *pACR4::ACR4\_D127A-mCitrine*, *pACR4::ACR4\_Y157A-mCitrine*, *pACR4::ACR4\_N158A-*  
391 *mCitrine*, *pACR4::ACR4\_Y157A*, *N158A-mCitrine*, *pACR4::ACR4\_Y218A-mCitrine*,  
392 *pACR4::ACR4\_N158Q*, *N196Q-HA*. They were transformed in *acr4-2* background by floral  
393 dipping method<sup>73</sup> with *Agrobacterium tumefaciens* strain GV3101 (Supplementary Table 3).

394

### 395 **Seed counting and statistical analysis**

396 Plants were germinated on 0.5 MS (Murashige and Skoog) agar plates after 3 days in dark at  
397 4°C. Seedling were transferred to soil and grown at 22°C, under long days (16 h light / 8 h dark) for  
398 6 weeks. A top opened flower was defined as position 1 and a silique at position 12 was collected  
399 for analyses in a blind manner. 10 siliques were sampled for independent lines as biological  
400 replicates and seeds were counted under a stereo microscope. The simultaneous comparisons of the  
401 different transgenic lines vs wild type were performed using the Dunnett procedure<sup>74</sup> for the primary  
402 endpoint number seeds per silique using the count transformation model<sup>75</sup>. The Comprehensive R  
403 Archive Network packages *multcomp*<sup>76</sup> and *cotram*<sup>75</sup> were used in R, version 3.6.3.

404

## 405 **Data availability**

406 Data supporting the findings of this manuscript are available from the corresponding authors  
407 upon reasonable request. A reporting summary for this article is available as a Supplementary  
408 Information file. Coordinates and structure factors have been deposited in the Protein Data Bank  
409 (PDB) with accession codes 7A0J (ACR4<sup>WD40</sup>) and 7A0K (PpCR4<sup>WD40-CRD</sup>).

410

## 411 **Acknowledgments**

412 We thank K. Lau for help with crystallographic data collection and U. Hohmann, D. Couto  
413 and J. Santiago for providing feedback on the manuscript. This work was supported by grants  
414 31003A\_176237 and 31CP30\_180213 from the Swiss National Science Foundation (to MH), by a  
415 Howard Hughes Medical Institute (HHMI) International Research Scholar Award (to MH) and by a  
416 Human Frontier Science Program (HFSP) postdoctoral fellowship (to SO).

417

## 418 **Author contributions**

419 MH and SO designed the study, SO performed all biochemical and genetic experiments, SO  
420 and MH phased and refined the structures, LAH performed the statistical analysis and SO and MH  
421 wrote the manuscript.

422

## 423 **Conflict of interest**

424 The authors declare no conflict of interest.

425

## 426 **Figure legends**

427 **Figure 1. CRINKLY 4 receptor kinases harbor structurally unique  $\beta$ -propeller and cysteine-**  
428 **rich domains.**

429 **a**, ACR4 domain scheme: SP, signal peptide; WD40, WD40 domain; CRD, cysteine-rich domain;  
430 TM, transmembrane helix; JM, juxtamembrane region; CT, C-terminal tail. **b**, SDS-PAGE analysis  
431 of purified CRINKLY4 proteins expressed in insect cells. **c**, Autoradiography *in vitro* kinase assay  
432 of the wild-type ACR4 kinase domain fused to maltose-binding protein (MBP), and of the unfused  
433 kinase domain carrying a point mutation (Asp659  $\rightarrow$  Asn) in the active site. The coomassie-stained  
434 gel loading control is shown in b (lanes on the right of the dotted line). **d**, Ribbon diagrams of  
435 ACR4<sup>WD40</sup> in two orientations and colored from N- (yellow) to C-terminus (green). Disulfide bonds  
436 are shown in bonds representation and highlighted by yellow circles. **e**, Structure of PpCR4<sup>WD40-CRD</sup>  
437 shown in two different orientations and colored in blue (WD40 domain) and yellow (CRD),

438 respectively. The N-glycans visible in the electron density map are depicted in bonds representation  
439 (in gray).c

440

441 **Figure 2. The ACR4 ectodomain does not bind the peptide hormone CLE40 *in vitro*.**

442 **a**, SDS-PAGE analysis of the biotinylated ACR4<sup>WD40-CRD</sup> and AtBAM1<sup>LRR</sup> ectodomains used for  
443 binding experiments. **b**, Quantitative grating-coupled interferometry (GCI) binding assay of a  
444 synthetic CLE40 peptide versus ACR4<sup>WD-CRD</sup> and BAM1<sup>LRR</sup>. Shown are sensorgrams with raw data  
445 in red and their respective fits in black. Table summaries of kinetic parameters are shown alongside  
446 ( $D_c$ , density of captured protein;  $k_t$ , mass transport coefficient;  $k_{on}$ , association rate constant;  $k_{off}$ ,  
447 dissociation rate constant;  $K_d$ , dissociation constant; n.d., no detectable binding, n=3). **c**, Isothermal  
448 titration calorimetry (ITC) experiment of ACR4<sup>WD-CRD</sup> versus CLE40. No binding was detected in  
449 this assay (n=3).

450

451 **Figure 3. CRINKLY4 ectodomains harbor an evolutionary conserved function.**

452 **a**, Reverse genetic rescue experiments of the seed development phenotype of *acr4-2*. Left panel:  
453 Seed development phenotypes of wild type, *acr4-2* and a complemented line. Right panel: Ten  
454 siliques per transgenic line from three independent homozygous T3 lines were pooled and plotted as  
455 beeswarm plots with the bold line representing mean, whiskers indicating the standard deviation,  
456 and circles depicting the raw data. Seed counts per silique significantly different from wild type  
457 were determined by simultaneous comparisons of several mutants against wild type using the  
458 Dunnett procedure (indicated by an asterisk). **b**, Ribbon diagram overview of PpCR4<sup>WD40-CRD</sup> (colors  
459 as in Fig. 1) and close-up view of the CRD superimposed to a type I TNF receptor ectodomain  
460 (PDB-ID 1NCF<sup>77</sup>; in gray). The six invariant disulfide bridges of CRINKLY4 CRDs are shown in  
461 green, the disulfide bonds in TNFR are shown in gray (in bonds representation). **c**, Superposition of  
462 the structurally homologous PpCR4<sup>CRD</sup> (in yellow) and TNFR (in gray) core segments (r.m.s.d. is ~1  
463 Å comparing 20 corresponding C $\alpha$  atoms). **d**, Analytical size-exclusion chromatography of  
464 ACR4<sup>WD40-CRD</sup> in the pre- or absence of Tris(2-carboxyethyl)phosphine (TCEP). Void ( $V_0$ ), total ( $V_t$ ),  
465 and elution volumes for molecular-mass standards (Al, Aldolase, 158 kDa; Co, Conalbumin, 75  
466 kDa; Ov, Ovalbumin, 44 kDa; CA, Carbonic Anhydrase, 29 kDa; R, Ribonuclease A, 13.7 kDa; Ap,  
467 Aprotinin; 6.5 kDa) are indicated. **e**, SDS-PAGE analysis of fractions shown in d.

468

469 **Figure 4. The CRINKLY4 WD40 domain contains a putative ligand binding groove.**

470 **a**, Ribbon diagram of ACR4<sup>WD40</sup> (in blue) with surface exposed conserved residues shown in bonds  
471 representation (in orange) at the exposed surface. Blade numbers are indicated. **b**, Effect on surface

472 point-mutations on ACR4-mediated seed production. Ten siliques per transgenic line from three  
473 independent homozygous T3 complementation lines were pooled and plotted as beeswarm plots  
474 with the bold line representing mean, whiskers indicating the standard deviation, and circles  
475 depicting the raw data. The plots for wild type, *acr4-2* and *ACR4* were generated from same data  
476 sets shown in Fig. 3a. Seed counts per silique significantly different from wild type were  
477 determined by simultaneous comparisons of several mutants against wild type using the Dunnett  
478 procedure (indicated by an asterisk). **c**, Molecular surface of the ACR4<sup>WD40</sup>  $\beta$ -propeller domain  
479 'back side' (in light blue). The positions of the mutated residues are highlighted in orange. **d**,  
480 Comparison of the 'front sides' of the structurally related WD40 domains of COP1 (PDB-ID  
481 6QTO<sup>43</sup> left panel) and ACR4 (right panel, r.m.s.d is  $\sim 3.5$  comparing 205 corresponding C $\alpha$  atoms).  
482 The COP1 VP-peptide ligand derived from the transcription factor HY5 is shown in yellow. Note  
483 the large and deep putative binding groove in the corresponding surface area in ACR4<sup>WD40</sup>.

484

485 **Supplementary Figure 1. Structure-based multiple sequence alignment of CRINKLY4**  
486 **receptor ectodomains from different species.**

487 Structure based T-COFFEE<sup>78</sup> sequence alignment and including a secondary structure assignment  
488 calculated with DSSP<sup>79</sup> (WD40 domain in blue, CRD in yellow). Invariant cysteine residues  
489 contributing to disulfide bonds in the WD40 domain or CRD domain are highlighted in yellow and  
490 green, respectively. Residues analyzed with point mutations in this study are shown in orange.  
491 Conserved residues in the WD40 – CRD domain interface are depicted in gray. Asterisks denote the  
492 location of experimentally confirmed N-glycosylation sites. Red arrows represent domain  
493 boundaries for the  $\Delta$ TNFR/CRD deletion constructs in previous reports: (1)<sup>24</sup>, (2)<sup>20</sup>. ACR4  
494 (*Arabidopsis thaliana*) UNIPROT-ID (<http://uniprot.org>) Q9LX29; PpCR4 (*Physcomitrella patens*)  
495 A9RKG8; ZmCR4 (*Zea mays*) O24585; OsCR4 (*Oryza sativa*) Q75J39; SmCR4 (*Selaginella*  
496 *moellendorffii*) D8T625. Note that the annotated SmCR4 sequence may be incomplete.

497

498 **Supplementary Figure 2. CRINKLY4 receptor ectodomains behave as monomers in solution.**

499 Analytical size-exclusion chromatography of the ACR4<sup>WD40-CRD</sup>, ACR4<sup>WD40</sup> and PpCR4<sup>WD40-CRD</sup> in the  
500 presence or absence of enzymatic deglycosylation. The void volume ( $V_0$ ), the total column volume  
501 ( $V_t$ ), and the elution volumes for molecular-mass standards (Al, Aldolase, 158 kDa; Co,  
502 Conalbumin, 75 kDa; Ov, Ovalbumin, 44 kDa; CA, Carbonic Anhydrase, 29 kDa; R, Ribonuclease  
503 A, 13.7 kDa; Ap, Aprotinin; 6.5 kDa) are indicated.

504

505 **Supplementary Figure 3. ACR4<sup>WD40</sup> shares structural features with known WD40 domains.**



506 Structural superposition of ACR4<sup>WD40</sup> (blue ribbon diagram) with **a**, the secreted  $\beta$ -lactamase  
507 inhibitor protein II BLIP-II (PDB-ID 1JTD<sup>39</sup>, in yellow) from the bacterium *Streptomyces exfoliatus*  
508 (r.m.s.d. is  $\sim 2.2$  Å comparing 192 corresponding C $\alpha$  atoms), and **b**, with the WD40 domain of the  
509 UV-B photoreceptor UVR8 (PDB-ID 4D9S<sup>40</sup>, r.m.s.d. is  $\sim 2.4$  Å comparing 218 corresponding C $\alpha$   
510 atoms). Note that SeBLIP-II and UVR8 shares the blade number and overall architecture with  
511 ACR4<sup>WD40</sup>, but lack the buried N-terminal strand and the conserved disulfide bonds stabilizing each  
512 blade.

513

514 **Supplementary Figure 4. Expression and purification attempts of the AtCLV1 LRR**  
515 **ectodomain.**

516 Shown are immunoblot analyses monitoring the secreted expression of the AtCLV1 ectodomain  
517 (see Methods) with an anti-His antibody (left panels, Day, days post infection, MOI, multiplicity of  
518 infection; SN, supernatant; P, pellet). Right panel: Preparative size-exclusion chromatography of the  
519 purified AtCLV1 ectodomain reveals the presence of large aggregates. The void (V<sub>0</sub>), total (V<sub>t</sub>), and  
520 elution volumes for molecular-mass standards (Al, Aldolase, 158 kDa; Co, Conalbumin, 75 kDa;  
521 Ov, Ovalbumin, 44 kDa; CA, Carbonic Anhydrase, 29 kDa; R, Ribonuclease A, 13.7 kDa; Ap,  
522 Aprotinin; 6.5 kDa) are indicated.

523

524 **Supplementary Figure 5. Only small WD40 - CRD inter-domain movements can be observed**  
525 **in the PpCR4 crystal structure.**

526 Structural superposition of the eight molecules located in the asymmetric unit of the PpCR4<sup>WD40-CRD</sup>  
527 crystal structure (r.m.s.d. is  $\sim 0.3$ - $0.5$  Å comparing 360 corresponding C $\alpha$  atoms). Individual  
528 molecules are shown in different colors as C $\alpha$  traces.

529

530 **Supplementary Figure 6. Overview of the WD40 – CRD domain interface in the PpCRD<sup>WD40-</sup>**  
531 **CRD structure.**

532 Shown is a ribbon diagram of the PpCR4 ectodomain (colored according to Fig. 1e) with selected  
533 interface residues shown in bonds representation. Hydrogen bonds and salt bridges are indicated by  
534 dotted lines.

535

536 **Supplementary Figure 7. Structural visualization of the TNFR/CRD domain boundaries used**  
537 **in this and in previous studies.**

538 Ribbon diagram of PpCR4<sup>WD40-CRD</sup> with the WD40 domain shown in blue and the experimentally  
539 determined CRD domain boundaries shown in yellow (left panel). The previously used TNFR

540 domain boundaries<sup>20,24</sup> derived from sequence analysis (in orange) omit the most N-terminal  $\beta$ -  
541 strand in the CRD (in blue, indicated by a black arrow).

542

543 **Supplementary Figure 8. Structurally conserved loop regions contribute to the formation of a**  
544 **putative ligand binding groove in CRINKLY4 WD40 domains.**

545 **a**, Structural superposition of the isolated WD40 domain from ACR4 (blue) and PpCR4 (light gray,  
546 r.m.s.d. is  $\sim 1.4$  Å comparing 246 corresponding  $C_{\alpha}$  atoms reveals the loop regions contributing to  
547 the formation of a putative ligand binding groove to adopt similar orientations in both structures. **b**,  
548 A temperature (B-) factor plot of PpCR4<sup>WD40-CRD</sup> (molecule chain A) reveals little structural  
549 flexibility for the secondary structure elements forming part of the putative binding groove, while  
550 the partially disordered loops connecting the blades of the  $\beta$ -propeller and the loops connecting the  
551 CRD appear mobile in the PpCR4<sup>WD40-CRD</sup> crystal structure.

552 **Supplementary Table 1. Crystallographic data collection and refinement statistics.**

|                                                                   | <b>ACR4<sup>WD40</sup></b><br><b>7A0J</b> | <b>PpCR4<sup>WD40-CRD</sup></b><br><b>7A0K</b> |
|-------------------------------------------------------------------|-------------------------------------------|------------------------------------------------|
| <b>PDB-ID</b>                                                     |                                           |                                                |
| <b>Data collection</b>                                            |                                           |                                                |
| Space group                                                       | <i>P</i> 2 <sub>1</sub>                   | <i>P</i> 2 <sub>1</sub>                        |
| Cell dimensions                                                   |                                           |                                                |
| <i>a</i> , <i>b</i> , <i>c</i> (Å)                                | 75.0, 88.0, 88.6, 90, 90.1, 90            | 88.6, 184.0, 98.2                              |
| $\alpha$ , $\beta$ , $\gamma$ (°)                                 | 90, 90.1, 90                              | 90, 96.1, 90                                   |
| Resolution (Å)                                                    | 48.05 – 1.95 (2.07 – 1.95)                | 45.87 – 2.70 (2.86 – 2.70)                     |
| <i>R</i> <sub>meas</sub> <sup>#</sup>                             | 0.125 (1.94)                              | 0.151 (1.89)                                   |
| CC(1/2) <sup>#</sup>                                              | 1.0 (0.4)                                 | 1.0 (0.46)                                     |
| <i>I</i> / $\sigma$ <i>I</i> <sup>#</sup>                         | 8.75 (0.91)                               | 12.01 (0.98)                                   |
| Completeness (%) <sup>#</sup>                                     | 99.7 (98.3)                               | 99.9 (99.7)                                    |
| Redundancy <sup>#</sup>                                           | 6.8 (6.6)                                 | 7.0 (6.6)                                      |
| Wilson B-factor <sup>#</sup>                                      | 40.2                                      | 71.5                                           |
| <b>Refinement</b>                                                 |                                           |                                                |
| Resolution (Å)                                                    | 48.05 – 1.95                              | 45.87 – 2.70                                   |
| No. reflections                                                   | 79,774                                    | 85,621                                         |
| <i>R</i> <sub>work</sub> / <i>R</i> <sub>free</sub> <sup>\$</sup> | 0.22 (0.24)                               | 0.22 (0.25)                                    |
| No. atoms                                                         |                                           |                                                |
| protein                                                           | 7,980                                     | 20,414                                         |
| carbohydrate/buffer                                               | 106                                       | 524                                            |
| solvent                                                           | 270                                       | 134                                            |
| Res. B-factors <sup>\$</sup>                                      |                                           |                                                |
| protein                                                           | 53.7                                      | 90.8                                           |
| carbohydrate/buffer                                               | 61.6                                      | 97.6                                           |
| solvent                                                           | 48.4                                      | 66.1                                           |
| R.m.s deviations <sup>\$</sup>                                    |                                           |                                                |
| bond lengths (Å)                                                  | 0.0135                                    | 0.0027                                         |
| bond angles (°)                                                   | 1.64                                      | 0.60                                           |
| Ramachandran plot <sup>\$</sup> :                                 |                                           |                                                |
| most favored regions (%)                                          | 97.0                                      | 96.1                                           |
| outliers (%)                                                      | 0                                         | 0.2                                            |
| MolProbity score <sup>\$</sup>                                    | 1.06                                      | 1.27                                           |

553 \*as defined in XDS<sup>61</sup>

554 +as defined Refmac5<sup>65</sup> or phenix.refine<sup>70</sup>

555 \$as defined in Molprobity<sup>60</sup>

556 **Supplementary Table 2. Primers used in this study**

| Primer Name       | Sequence                                                | Description                                    |
|-------------------|---------------------------------------------------------|------------------------------------------------|
| ACR4prom_B4-F     | GGGGACAACCTTTGTATAGAAAAGTTGACGAGATAGTCAAGAAATGGCCTTTC   | cloning of ACR4 promoter region                |
| ACR4prom_B1r-R    | GGGGACTGCTTTTTGTACAAAAGTCTCTTTTCAAAGTCAACACACACG        | cloning of ACR4 promoter region                |
| ACR4cds_B1-F      | GGGGACAAGTTTGTACAAAAAAGCAGGCTGAATGAGAATGTTGAAACGAGAG    | cloning of ACR4 coding sequence                |
| ACR4cds_B2r-R     | GGGGACCACTTTGTACAAGAAAGCTGGGTAGAAATTATGATGCAAGAACAAGC   | cloning of ACR4 coding sequence                |
| ACR4delK_B2rR     | GGGGACCACTTTGTACAAGAAAGCTGGGTATTGCAGCTCATCAAGATC        | Δcyto construct for transgenic plant           |
| ACR4_K540R_For    | GCAGTGAGAAGAGCGATAATGTCATCAGACAAACAGAAG                 | site directed mutagenesis for transgenic plant |
| ACR4_K540R_Rev    | CGCTCTTCTCACTGCAACAGTGGTTCATCTCTCAG                     | site directed mutagenesis for transgenic plant |
| ACR4_delTNFR_Fw   | CCTGCTTCTATCCCTAAGTTTTGGTCACTGCAGCTAC                   | ΔCRD construct for transgenic plant            |
| ACR4_delTNFR_Rv   | CAGTGACCAAACTTAGGGATAGAAGCAGGGAAACC                     | ΔCRD construct for transgenic plant            |
| ACR4_D84A_F       | GGGTGGAGCTGGGTTTATGTGTGGGC                              | site directed mutagenesis for transgenic plant |
| ACR4_D84A_R       | ATAAACCCAGCTCCACCCGTAAACCG                              | site directed mutagenesis for transgenic plant |
| ACR4_F105A_F      | CAGTGCAGCTATTCAAATGGGAGTTCCTC                           | site directed mutagenesis for transgenic plant |
| ACR4_F105A_R      | ATTTGAATAGCTGCACTGTTTCCCAAC                             | site directed mutagenesis for transgenic plant |
| ACR4_D127A_F      | TGCTGGTGCTTACCATCTTTGTGGTTTGAG                          | site directed mutagenesis for transgenic plant |
| ACR4_D127A_R      | AGATGGTAAGCACCAGCACTAACTTCTAAATAC                       | site directed mutagenesis for transgenic plant |
| ACR4_Y157A_F      | TTGGGGTGCTAATATGACAAGAAACTTTGTCTTTG                     | site directed mutagenesis for transgenic plant |
| ACR4_Y157A_R      | GTCATATTAGCACCCCAACAATCAACAAG                           | site directed mutagenesis for transgenic plant |
| ACR4_N158A_F      | GGGTTACGCTATGACAAGAACTTTGTCTTTG                         | site directed mutagenesis for transgenic plant |
| ACR4_N158A_R      | CTTGTCATAGCGTAACCCCAACAATCAAC                           | site directed mutagenesis for transgenic plant |
| ACR4_Y157,N158A_F | TTGGGGTGCTGCTATGACAAGAAACTTTGTCTTTG                     | site directed mutagenesis for transgenic plant |
| ACR4_Y157,N158A_R | CTTGTCATAGCAGCACCCCAACAATCAACAAG                        | site directed mutagenesis for transgenic plant |
| ACR4_Y218A_F      | TGGTGGAGCTCATGTTTGTGGCATTCTTG                           | site directed mutagenesis for transgenic plant |
| ACR4_Y218A_R      | ACAAACATGAGCTCCACCAGCTGCAATTTTC                         | site directed mutagenesis for transgenic plant |
| ACR4_N158Q_For    | GGTTACCAGATGACAAGAACTTTGTCTTTGATAAGCAG                  | site directed mutagenesis for transgenic plant |
| ACR4_N158Q_Rev    | TGTCATCTGGTAACCCCAACAATCAACAAG                          | site directed mutagenesis for transgenic plant |
| ACR4_N196Q_For    | GATGAGCAGAGTAGTCAAGTAATCAGTTTAAATCCCAAG                 | site directed mutagenesis for transgenic plant |
| ACR4_N196Q_Rev    | ACTACTCTGCTCATCTCCCAACAGAAAACCGAC                       | site directed mutagenesis for transgenic plant |
| ACR4_pBB2_ins_f   | TTATTCATACCGTCCCACCATCGGGCGGGATGAGAATGTTGAAACGAGAG      | protein expression in insect cell              |
| 334-pBB2_Rv       | CCCTGGAAGTACAGGTTCTCGAGTTAAGGGATAGAAGCAGGGAAC           | protein expression in insect cell              |
| ACR4_pBB2_423r    | CATGCAGAGCCCTGGAAGTACAGGTTCTCGAGTCTTTTCTTGCCCTCCAC      | protein expression in insect cell              |
| ACR4_423_Avi_Rv   | AGCCTCGAAGATGTCGTTTCAGACCCTCGAGTCTTTTCTTGCTCCACTGGTAGCC | protein expression in insect cell              |
| ACR4_497-F_Nco1   | CGCCATGGCTAGAGTTTCACTTATGAGGAACCTG                      | protein expression in insect cell              |
| ACR4_792-R_Not1   | TTAGCGGCCGCTTATTATAGCTGTGCAAGCGCTCG                     | protein expression in insect cell              |
| PpCR4_pBB2_Fw     | ATACCGTCCCACCATCGGGCGGGAGCTCATGCCTGTACTCGTGCC           | protein expression in insect cell              |
| PpCR4_P405_Rv     | TCGAAGATGTCGTTTCAGACCCTCGAGTGGAGCCTTTGAAGGGTTATAAC      | protein expression in insect cell              |
| CLV1co_T25_Fw     | TGTTGGCCTCTCGCTCGGGGCTACCATGGGATACACCGACATGAGGTGC       | protein expression in insect cell              |

|                |                                                              |                                                                  |
|----------------|--------------------------------------------------------------|------------------------------------------------------------------|
| CLV1co_P621_Rv | AGCCTCGAAGATGTCGTTTCAGACCCTCGAGAGGGCAGGACA<br>CACGG          | protein expression in insect cell                                |
| BAM1_BiP_F     | CTTTGTTGGCCTCTCGCTCGGGGCTACCATGGGACGACCAATC<br>TCCGAG        | protein expression in insect cell                                |
| BAM1_Avi_R     | AGCCTCGAAGATGTCGTTTCAGACCCTCGAGTGATAAAGGTCC<br>TTTACTATGACTC | protein expression in insect cell                                |
| ACR4_D659N_For | GTAGCTAACTTTGGTCTCTCCTTACTTGGTCTGTCCG                        | site directed mutagenesis for kinase-dead<br>recombinant protein |
| ACR4_D659N_Rev | GACCAAAGTTAGCTACTCGAGCATTGTGTCTTCATC                         | site directed mutagenesis for kinase-dead<br>recombinant protein |

557 F, For, Fw: Forward; R, Rev, Rv: Reverse

558

559 **Supplementary Table 3. Transgenic lines generated in this study**

| Name               | residues (amino acids)             | Tag      | Resistance | Genetic background |
|--------------------|------------------------------------|----------|------------|--------------------|
| ACR4               | 1 – 895                            | mCitrine | Hygromycin | <i>acr4-2</i>      |
| ACR4 $\Delta$ cyto | 1 – 492                            | mCitrine | Hygromycin | <i>acr4-2</i>      |
| ACR4 kinase dead   | 1 – 895 (K540R)                    | 6x HA    | Hygromycin | <i>acr4-2</i>      |
| ACR4 $\Delta$ CRD  | 1 – 895 with deletion 335 –<br>423 | mCitrine | Hygromycin | <i>acr4-2</i>      |
| PpCR4              | 1 – 893                            | mCitrine | Hygromycin | <i>acr4-2</i>      |
| ACR4 D84A          | 1 – 895 (D84A)                     | mCitrine | Hygromycin | <i>acr4-2</i>      |
| ACR4 F105A         | 1 – 895 (F105A)                    | mCitrine | Hygromycin | <i>acr4-2</i>      |
| ACR4 D127A         | 1 – 895 (D127A)                    | mCitrine | Hygromycin | <i>acr4-2</i>      |
| ACR4 Y157A         | 1 – 895 (Y157A)                    | mCitrine | Hygromycin | <i>acr4-2</i>      |
| ACR4 N158A         | 1 – 895 (N158A)                    | mCitrine | Hygromycin | <i>acr4-2</i>      |
| ACR4 Y157A, N158A  | 1 – 895 (Y157A/N158A)              | mCitrine | Hygromycin | <i>acr4-2</i>      |
| ACR4 N158Q, N196Q  | 1 – 895 (N158Q/N196Q)              | 6x HA    | Hygromycin | <i>acr4-2</i>      |
| ACR4 Y218A         | 1 – 895 (Y218A)                    | mCitrine | Hygromycin | <i>acr4-2</i>      |

560

## 561 **References**

1. Shiu, S. H. & Bleeker, A. B. Receptor-like kinases from Arabidopsis form a monophyletic gene family related to animal receptor kinases. *Proc. Natl. Acad. Sci. U. S. A.* **98**, 10763–10768 (2001).
2. Hohmann, U., Lau, K. & Hothorn, M. The Structural Basis of Ligand Perception and Signal Activation by Receptor Kinases. *Annu. Rev. Plant Biol.* **68**, 109–137 (2017).
3. Bozsoki, Z. *et al.* Receptor-mediated chitin perception in legume roots is functionally separable from Nod factor perception. *Proc. Natl. Acad. Sci. U. S. A.* **114**, E8118–E8127 (2017).
4. Liu, T. *et al.* Chitin-Induced Dimerization Activates a Plant Immune Receptor. *Science* **336**, 1160–1164 (2012).
5. Liu, S. *et al.* Molecular Mechanism for Fungal Cell Wall Recognition by Rice Chitin Receptor OsCEBiP. *Structure* **24**, 1192–1200 (2016).
6. Ma, R. *et al.* Structural basis for specific self-incompatibility response in Brassica. *Cell Res.* **26**, 1320–1329 (2016).
7. Moussu, S. & Santiago, J. Structural biology of cell surface receptor-ligand interactions. *Curr. Opin. Plant Biol.* **52**, 38–45 (2019).
8. Vaattovaara, A. *et al.* Mechanistic insights into the evolution of DUF26-containing proteins in land plants. *Commun. Biol.* **2**, 56 (2019).
9. Moussu, S., Augustin, S., Roman, A. O., Broyart, C. & Santiago, J. Crystal structures of two tandem malectin-like receptor kinases involved in plant reproduction. *Acta Crystallogr. Sect. Struct. Biol.* **74**, 671–680 (2018).
10. Xiao, Y. *et al.* Mechanisms of RALF peptide perception by a heterotypic receptor complex. *Nature* **572**, 270–274 (2019).
11. Moussu, S. *et al.* Structural basis for recognition of RALF peptides by LRX proteins during pollen tube growth. *Proc. Natl. Acad. Sci. U. S. A.* **117**, 7494–7503 (2020).
12. Becraft, P. W., Stinard, P. S. & McCarty, D. R. CRINKLY4: A TNFR-like receptor kinase involved in maize epidermal differentiation. *Science* **273**, 1406–1409 (1996).
13. Jin, P., Guo, T. & Becraft, P. W. The maize CR4 receptor-like kinase mediates a growth factor-like differentiation response. *Genesis* **27**, 104–116 (2000).

14. Banner, D. W. *et al.* Crystal structure of the soluble human 55 kd TNF receptor-human TNF beta complex: implications for TNF receptor activation. *Cell* **73**, 431–445 (1993).
15. Sprang, S. R. The divergent receptors for TNF. *Trends Biochem. Sci.* **15**, 366–368 (1990).
16. Becraft, P. W., Kang, S. H. & Suh, S. G. The maize CRINKLY4 receptor kinase controls a cell-autonomous differentiation response. *Plant Physiol.* **127**, 486–496 (2001).
17. Tanaka, H. *et al.* ACR4, a putative receptor kinase gene of *Arabidopsis thaliana*, that is expressed in the outer cell layers of embryos and plants, is involved in proper embryogenesis. *Plant Cell Physiol.* **43**, 419–428 (2002).
18. Gifford, M. L., Dean, S. & Ingram, G. C. The *Arabidopsis* ACR4 gene plays a role in cell layer organisation during ovule integument and sepal margin development. *Development* **130**, 4249–4258 (2003).
19. Watanabe, M., Tanaka, H., Watanabe, D., Machida, C. & Machida, Y. The ACR4 receptor-like kinase is required for surface formation of epidermis-related tissues in *Arabidopsis thaliana*. *Plant J.* **39**, 298–308 (2004).
20. Gifford, M. L., Robertson, F. C., Soares, D. C. & Ingram, G. C. ARABIDOPSIS CRINKLY4 function, internalization, and turnover are dependent on the extracellular crinkly repeat domain. *Plant Cell* **17**, 1154–1166 (2005).
21. Cao, X., Li, K., Suh, S.-G., Guo, T. & Becraft, P. W. Molecular analysis of the CRINKLY4 gene family in *Arabidopsis thaliana*. *Planta* **220**, 645–657 (2005).
22. Meyer, M. R., Lichti, C. F., Townsend, R. R. & Rao, A. G. Identification of in vitro autophosphorylation sites and effects of phosphorylation on the *Arabidopsis* CRINKLY4 (ACR4) receptor-like kinase intracellular domain: insights into conformation, oligomerization, and activity. *Biochemistry* **50**, 2170–2186 (2011).
23. Zhao, Y., Liu, X., Xu, Z., Yang, H. & Li, J. Characterization and enzymatic properties of protein kinase ACR4 from *Arabidopsis thaliana*. *Biochem. Biophys. Res. Commun.* **489**, 270–274 (2017).
24. Qin, Y. *et al.* Redox-Mediated Endocytosis of a Receptor-Like Kinase during Distal Stem Cell Differentiation Depends on Its Tumor Necrosis Factor Receptor Domain. *Plant Physiol.* **181**, 1075–1095 (2019).

25. Nikonorova, N., Yue, K., Beeckman, T. & De Smet, I. Arabidopsis research requires a critical re-evaluation of genetic tools. *J. Exp. Bot.* **69**, 3541–3544 (2018).
26. Roeder, A. H. K., Cunha, A., Ohno, C. K. & Meyerowitz, E. M. Cell cycle regulates cell type in the Arabidopsis sepal. *Dev. Camb. Engl.* **139**, 4416–4427 (2012).
27. Xu, C. & Min, J. Structure and function of WD40 domain proteins. *Protein Cell* **2**, 202–214 (2011).
28. De Smet, I. *et al.* Receptor-like kinase ACR4 restricts formative cell divisions in the Arabidopsis root. *Science* **322**, 594–597 (2008).
29. Stahl, Y., Wink, R. H., Ingram, G. C. & Simon, R. A signaling module controlling the stem cell niche in Arabidopsis root meristems. *Curr. Biol.* **19**, 909–914 (2009).
30. Stahl, Y. & Simon, R. Peptides and receptors controlling root development. *Philos. Trans. R. Soc. Lond. B. Biol. Sci.* **367**, 1453–1460 (2012).
31. Berckmans, B., Kirschner, G., Gerlitz, N., Stadler, R. & Simon, R. CLE40 Signaling Regulates Root Stem Cell Fate. *Plant Physiol.* **182**, 1776–1792 (2020).
32. Stahl, Y. *et al.* Moderation of Arabidopsis root stemness by CLAVATA1 and ARABIDOPSIS CRINKLY4 receptor kinase complexes. *Curr. Biol. CB* **23**, 362–371 (2013).
33. Yue, K. *et al.* PP2A-3 interacts with ACR4 and regulates formative cell division in the Arabidopsis root. *Proc. Natl. Acad. Sci. U. S. A.* **113**, 1447–1452 (2016).
34. Meyer, M. R., Shah, S., Zhang, J., Rohrs, H. & Rao, A. G. Evidence for intermolecular interactions between the intracellular domains of the arabidopsis receptor-like kinase ACR4, its homologs and the Wox5 transcription factor. *PloS One* **10**, e0118861 (2015).
35. Demko, V., Ako, E., Perroud, P.-F., Quatrano, R. & Olsen, O.-A. The phenotype of the CRINKLY4 deletion mutant of *Physcomitrella patens* suggests a broad role in developmental regulation in early land plants. *Planta* **244**, 275–284 (2016).
36. Nikonorova, N., Vu, L. D., Czyzewicz, N., Gevaert, K. & De Smet, I. A phylogenetic approach to study the origin and evolution of the CRINKLY4 family. *Front. Plant Sci.* **6**, 880 (2015).
37. Krissinel, E. & Henrick, K. Inference of macromolecular assemblies from crystalline state. *J. Mol. Biol.* **372**, 774–797 (2007).



38. Holm, L. & Sander, C. Protein structure comparison by alignment of distance matrices. *J. Mol. Biol.* **233**, 123–138 (1993).
39. Lim, D. *et al.* Crystal structure and kinetic analysis of beta-lactamase inhibitor protein-II in complex with TEM-1 beta-lactamase. *Nat. Struct. Biol.* **8**, 848–852 (2001).
40. Christie, J. M. *et al.* Plant UVR8 photoreceptor senses UV-B by tryptophan-mediated disruption of cross-dimer salt bridges. *Science* **335**, 1492–1496 (2012).
41. Rizzini, L. *et al.* Perception of UV-B by the Arabidopsis UVR8 protein. *Science* **332**, 103–106 (2011).
42. Pugalenti, G., Nithya, V., Chou, K.-C. & Archunan, G. Nglyc: A Random Forest Method for Prediction of N-Glycosylation Sites in Eukaryotic Protein Sequence. *Protein Pept. Lett.* **27**, 178–186 (2020).
43. Lau, K., Podolec, R., Chappuis, R., Ulm, R. & Hothorn, M. Plant photoreceptors and their signaling components compete for COP1 binding via VP peptide motifs. *EMBO J.* **38**, e102140 (2019).
44. Anne, P. *et al.* CLERK is a novel receptor kinase required for sensing of root-active CLE peptides in Arabidopsis. *Development* **145**, pii: dev162354 (2018).
45. Okuda, S. *et al.* Molecular mechanism for the recognition of sequence-divergent CIF peptides by the plant receptor kinases GSO1/SGN3 and GSO2. *Proc. Natl. Acad. Sci. U. S. A.* **117**, 2693–2703 (2020).
46. Stokes, K. D. & Gururaj Rao, A. Dimerization properties of the transmembrane domains of Arabidopsis CRINKLY4 receptor-like kinase and homologs. *Arch. Biochem. Biophys.* **477**, 219–226 (2008).
47. Stokes, K. D. & Rao, A. G. The role of individual amino acids in the dimerization of CR4 and ACR4 transmembrane domains. *Arch. Biochem. Biophys.* **502**, 104–111 (2010).
48. Arabidopsis Genome Initiative. Analysis of the genome sequence of the flowering plant *Arabidopsis thaliana*. *Nature* **408**, 796–815 (2000).
49. Rensing, S. A. *et al.* The Physcomitrella genome reveals evolutionary insights into the conquest of land by plants. *Science* **319**, 64–69 (2008).

50. Haruta, M., Sabat, G., Stecker, K., Minkoff, B. B. & Sussman, M. R. A peptide hormone and its receptor protein kinase regulate plant cell expansion. *Science* **343**, 408–411 (2014).
51. Kessler, S. A., Lindner, H., Jones, D. S. & Grossniklaus, U. Functional analysis of related CrRLK1L receptor-like kinases in pollen tube reception. *EMBO Rep.* **16**, 107–115 (2015).
52. Haruta, M., Gaddameedi, V., Burch, H., Fernandez, D. & Sussman, M. R. Comparison of the effects of a kinase-dead mutation of FERONIA on ovule fertilization and root growth of *Arabidopsis*. *FEBS Lett.* **592**, 2395–2402 (2018).
53. Chen, J. *et al.* FERONIA interacts with ABI2-type phosphatases to facilitate signaling cross-talk between abscisic acid and RALF peptide in *Arabidopsis*. *Proc. Natl. Acad. Sci. U. S. A.* **113**, E5519–5527 (2016).
54. Franck, C. M. *et al.* The Protein Phosphatases ATUNIS1 and ATUNIS2 Regulate Cell Wall Integrity in Tip-Growing Cells. *Plant Cell* **30**, 1906–1923 (2018).
55. Tanaka, H. *et al.* Novel receptor-like kinase ALE2 controls shoot development by specifying epidermis in *Arabidopsis*. *Development* **134**, 1643–1652 (2007).
56. San-Bento, R., Farcot, E., Galletti, R., Creff, A. & Ingram, G. Epidermal identity is maintained by cell-cell communication via a universally active feedback loop in *Arabidopsis thaliana*. *Plant J.* **77**, 46–58 (2014).
57. Cull, M. G. & Schatz, P. J. Biotinylation of proteins in vivo and in vitro using small peptide tags. *Methods Enzymol.* **326**, 430–440 (2000).
58. Fairhead, M. & Howarth, M. Site-specific biotinylation of purified proteins using BirA. *Methods Mol. Biol.* **1266**, 171–184 (2015).
59. Hashimoto, Y., Zhang, S. & Blissard, G. W. Ao38, a new cell line from eggs of the black witch moth, *Ascalapha odorata* (Lepidoptera: Noctuidae), is permissive for AcMNPV infection and produces high levels of recombinant proteins. *BMC Biotechnol.* **10**, 50 (2010).
60. Bojar, D. *et al.* Crystal structures of the phosphorylated BRI1 kinase domain and implications for brassinosteroid signal initiation. *Plant J.* **78**, 31–43 (2014).
61. Kabsch, W. Automatic processing of rotation diffraction data from crystals of initially unknown symmetry and cell constants. *J. Appl. Crystallogr.* **26**, 795–800 (1993).
62. Sheldrick, G. M. A short history of SHELX. *Acta Crystallogr. A* **64**, 112–122 (2008).

63. Bricogne, G., Vornrhein, C., Flensburg, C., Schiltz, M. & Paciorek, W. Generation, representation and flow of phase information in structure determination: recent developments in and around SHARP 2.0. *Acta Crystallogr. D Biol. Crystallogr.* **59**, 2023–2030 (2003).
64. Terwilliger, T. C. *et al.* Iterative model building, structure refinement and density modification with the PHENIX AutoBuild wizard. *Acta Crystallogr. D Biol. Crystallogr.* **64**, 61–69 (2008).
65. Murshudov, G. N., Vagin, A. A. & Dodson, E. J. Refinement of macromolecular structures by the maximum-likelihood method. *Acta Crystallogr. D Biol. Crystallogr.* **53**, 240–255 (1997).
66. Evans, P. Scaling and assessment of data quality. *Acta Crystallogr. D Biol. Crystallogr.* **62**, 72–82 (2006).
67. Lebedev, A. A. & Isupov, M. N. Space-group and origin ambiguity in macromolecular structures with pseudo-symmetry and its treatment with the program Zanuda. *Acta Crystallogr. D Biol. Crystallogr.* **70**, 2430–2443 (2014).
68. McCoy, A. J. *et al.* Phaser crystallographic software. *J. Appl. Crystallogr.* **40**, 658–674 (2007).
69. Emsley, P. & Cowtan, K. Coot: model-building tools for molecular graphics. *Acta Crystallogr. D Biol. Crystallogr.* **60**, 2126–2132 (2004).
70. Afonine, P. V. *et al.* Towards automated crystallographic structure refinement with phenix.refine. *Acta Crystallogr. D Biol. Crystallogr.* **68**, 352–367 (2012).
71. Goddard, T. D. *et al.* UCSF ChimeraX: Meeting modern challenges in visualization and analysis. *Protein Sci.* **27**, 14–25 (2018).
72. Karimi, M., De Meyer, B. & Hilson, P. Modular cloning in plant cells. *Trends Plant Sci.* **10**, 103–105 (2005).
73. Clough, S. J. & Bent, A. F. Floral dip: a simplified method for *Agrobacterium*-mediated transformation of *Arabidopsis thaliana*. *Plant J.* **16**, 735–743 (1998).
74. Dunnett, C. W. A Multiple Comparison Procedure for Comparing Several Treatments with a Control. *J. Am. Stat. Assoc.* **50**, 1096–1121 (1955).
75. Siegfried, S. & Hothorn, T. Count transformation models. *Methods Ecol. Evol.* **11**, 818–827 (2020).
76. Hothorn, T., Bretz, F. & Westfall, P. Simultaneous inference in general parametric models. *Biom. J.* **50**, 346–363 (2008).

77. Naismith, J. H., Devine, T. Q., Brandhuber, B. J. & Sprang, S. R. Crystallographic evidence for dimerization of unliganded tumor necrosis factor receptor. *J. Biol. Chem.* **270**, 13303–13307 (1995).
78. Notredame, C., Higgins, D. G. & Heringa, J. T-coffee: a novel method for fast and accurate multiple sequence alignment1. *J. Mol. Biol.* **302**, 205–217 (2000).
79. Kabsch, W. & Sander, C. Dictionary of protein secondary structure: pattern recognition of hydrogen-bonded and geometrical features. *Biopolymers* **22**, 2577–2637 (1983).
80. Davis, I. W. *et al.* MolProbity: all-atom contacts and structure validation for proteins and nucleic acids. *Nucleic Acids Res.* **35**, W375-383 (2007).

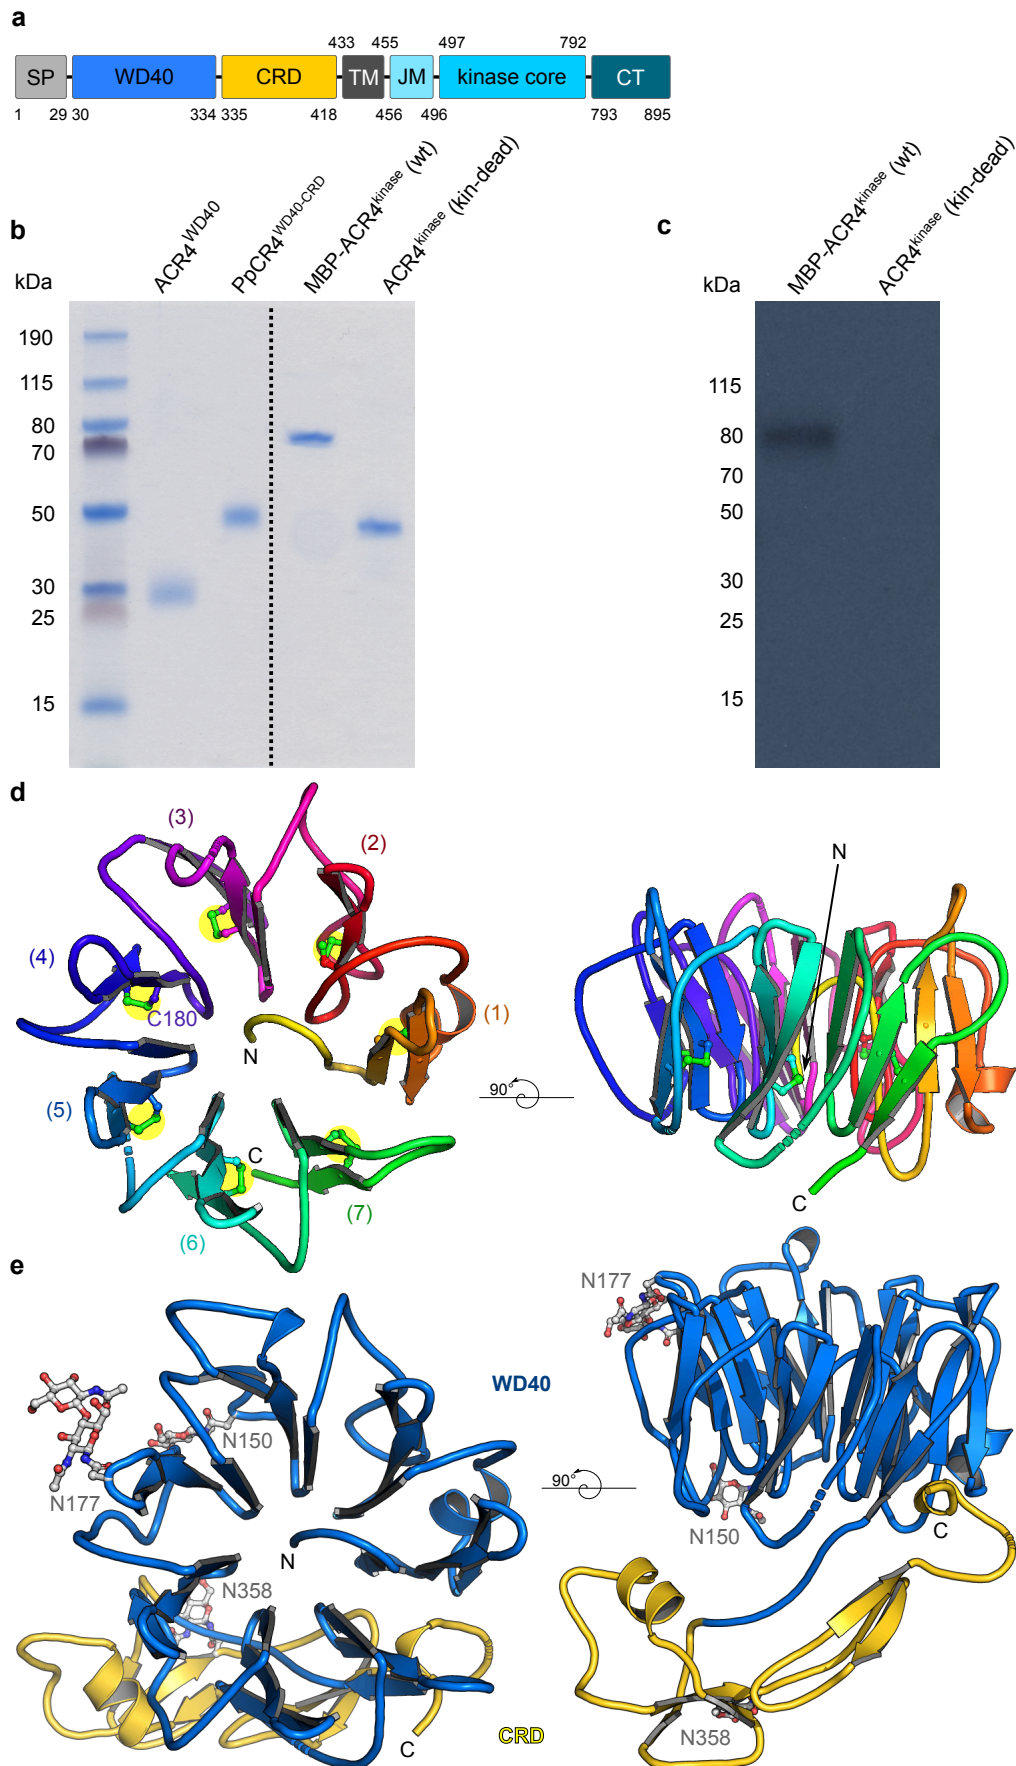

**Figure 1. CRINKLY 4 receptor kinases harbor structurally unique  $\beta$ -propeller and cysteine-rich domains.**

**a**, ACR4 domain scheme: SP, signal peptide; WD40, WD40 domain; CRD, cysteine-rich domain; TM, transmembrane helix; JM, juxtamembrane region; CT, C-terminal tail. **b**, SDS-PAGE analysis of purified CRINKLY4 proteins expressed in insect cells. **c**, Autoradiography *in vitro* kinase assay of the wild-type ACR4 kinase domain fused to maltose-binding protein (MBP), and of the unfused kinase domain carrying a point mutation (Asp659Asn) in the active site. The coomassie-stained gel loading control is shown in **b** (lanes on the right of the dotted line). **d**, Ribbon diagrams of ACR4<sup>WD40</sup> in two orientations and colored from N- (yellow) to C-terminus (green). Disulfide bonds are shown in bonds representation and highlighted by yellow circles. **e**, Structure of PpCR4<sup>WD40-CRD</sup> shown in two different orientation and colored in blue (WD40 domain) and yellow (CRD), respectively. The N-glycans visible in the electron density map are depicted in bonds representation (in gray).c++

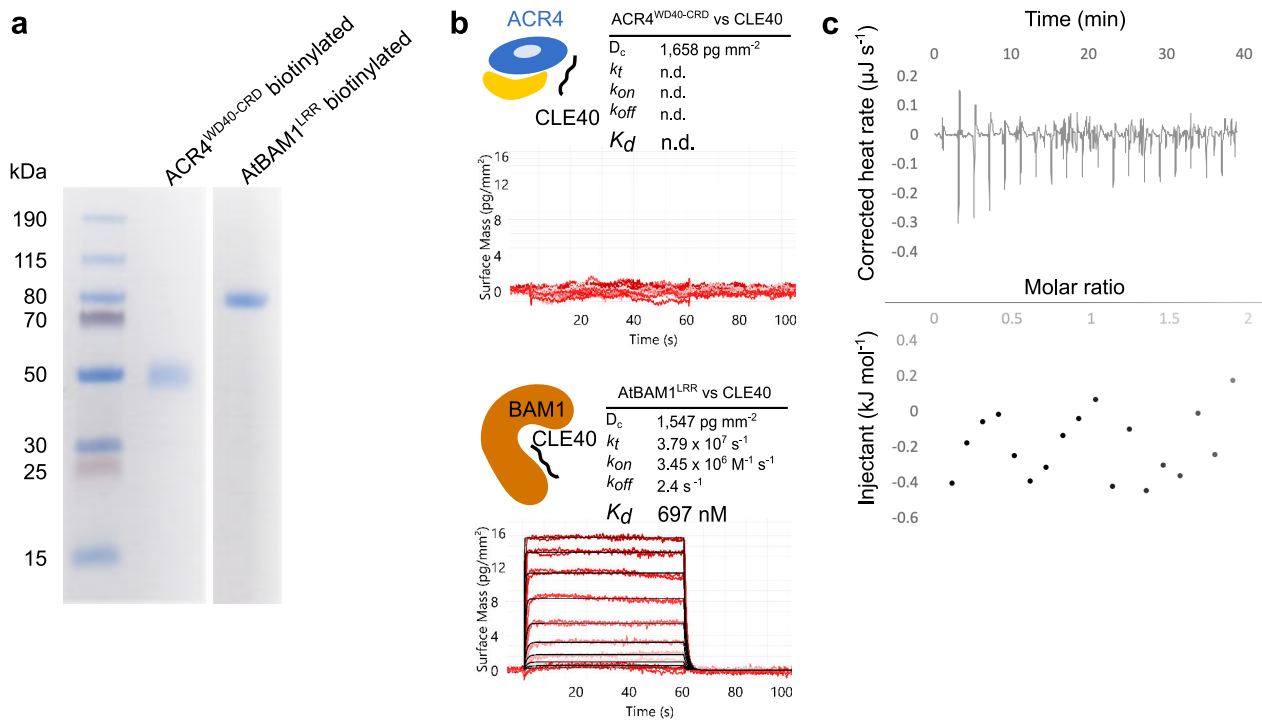

**Figure 2. The ACR4 ectodomain does not bind the peptide hormone CLE40 *in vitro*.**

**a**, SDS-PAGE analysis of the biotinylated ACR4<sup>WD40-CRD</sup> and AtBAM1<sup>LRR</sup> ectodomains used for binding experiments. **b**, Quantitative grating-coupled interferometry (GCI) binding assay of a synthetic CLE40 peptide versus ACR4<sup>WD-CRD</sup> and BAM1<sup>LRR</sup>. Shown are sensorgrams with raw data in red and their respective fits in black. Table summaries of kinetic parameters are shown alongside ( $D_c$ , density of captured protein;  $k_t$ , mass transport coefficient;  $k_{on}$ , association rate constant;  $k_{off}$ , dissociation rate constant;  $K_d$ , dissociation constant; n.d., no detectable binding,  $n=3$ ). **c**, Isothermal titration calorimetry (ITC) experiment of ACR4<sup>WD-CRD</sup> versus CLE40. No binding was detected in this assay ( $n=3$ ).

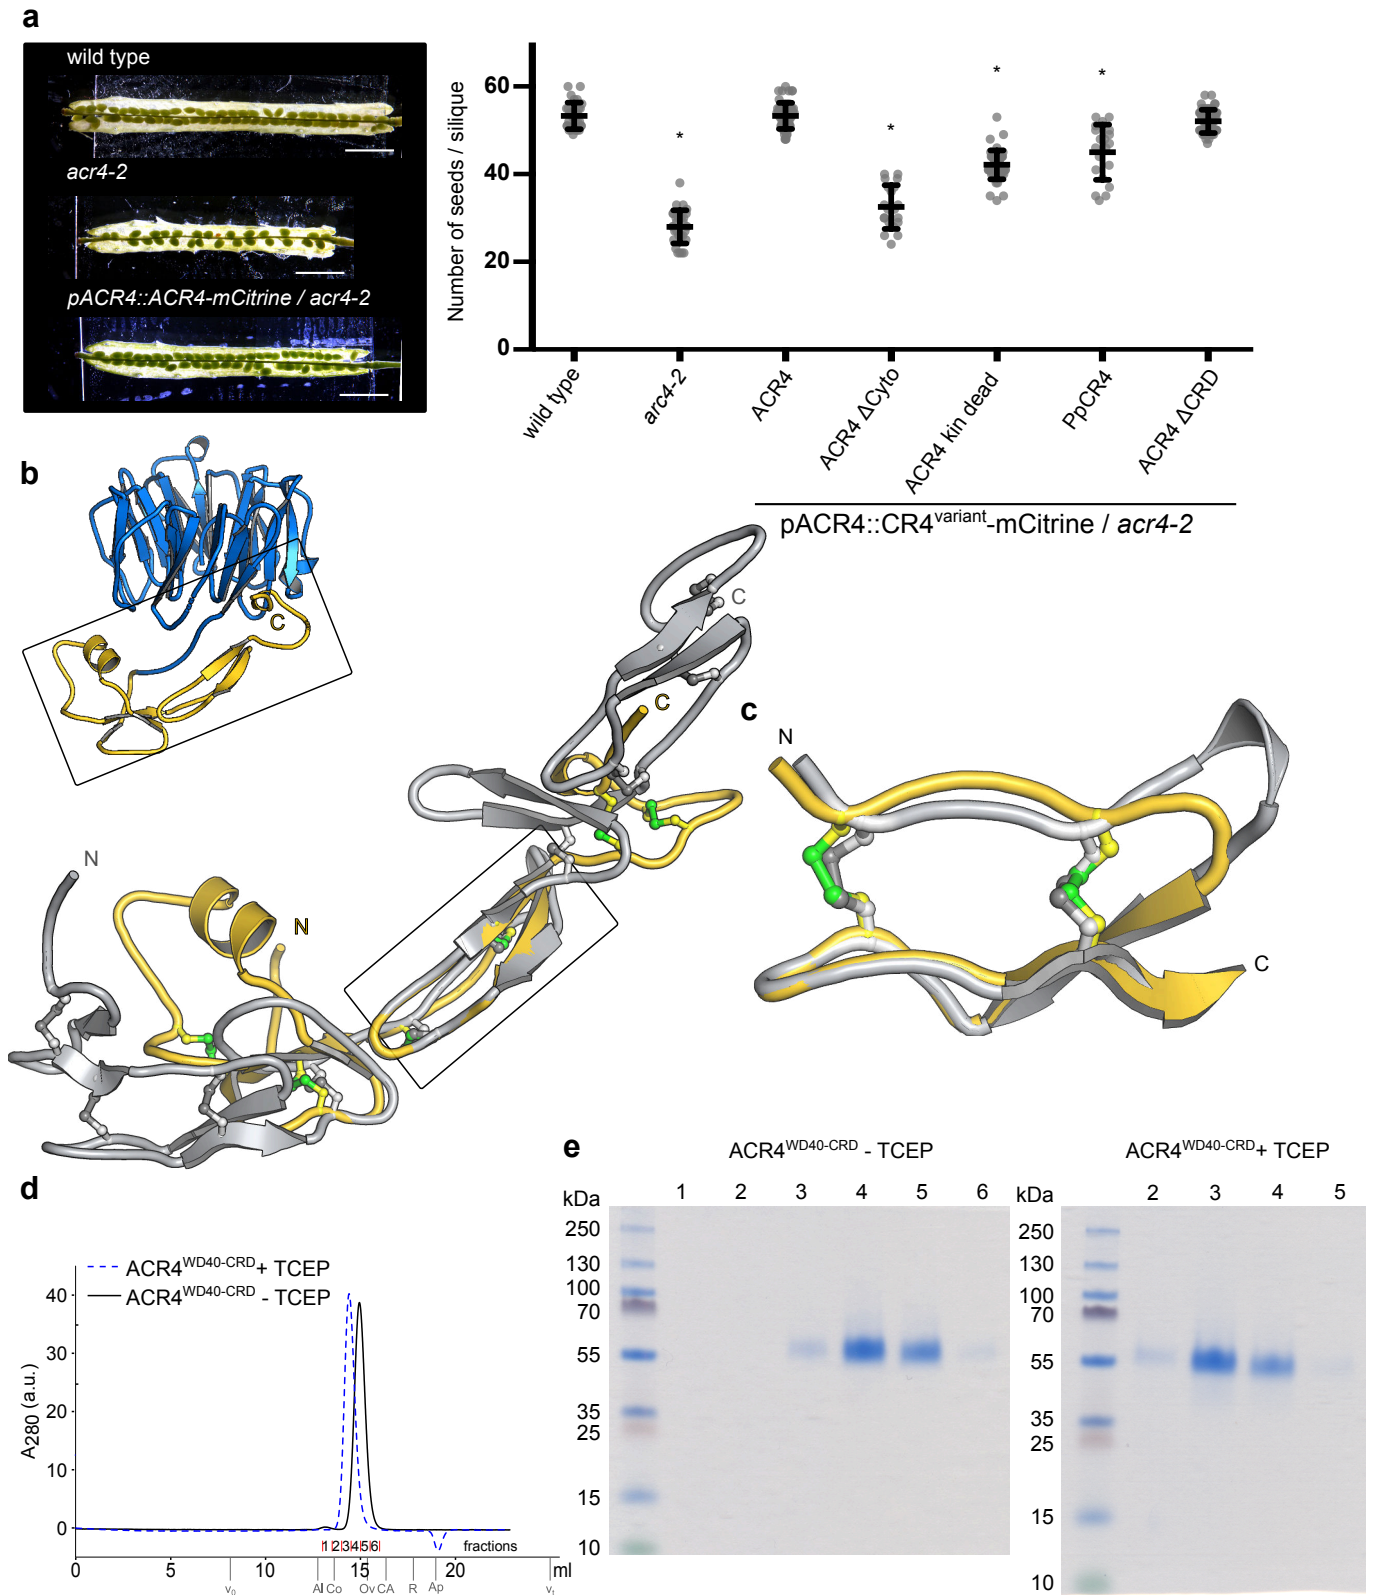

**Figure 3. CRINKLY4 ectodomains harbor an evolutionary conserved function.**

**a**, Reverse genetic rescue experiments of the seed filling phenotype of *acr4-2*. Left panel: Seed development phenotypes of wild type, *acr4-2* and a complemented line. Right panel: Ten siliques per transgenic line from three independent homozygous T3 lines were pooled and plotted as beeswarm plots with the bold line representing mean, whiskers indicating the standard deviation, and circles depicting the raw data. Seed counts per silique significantly different from wild type were determined by simultaneous comparisons of several mutants against wild type using the Dunnett procedure (indicated by an asterisk). **b**, Ribbon diagram overview of PpCR4<sup>WD40-CRD</sup> (colors as in Fig. 1) and close-up view of the CRD superimposed to a type I TNF receptor ectodomain (PDB-ID 1NCF<sup>77</sup>; in gray). The six invariant disulfide bridges of CRINKLY4 CRDs are shown in green, the disulfide bonds in TNFR are shown in gray (in bonds representation). **c**, Superposition of the structurally homologous PpCR4<sup>CRD</sup> (in yellow) and TNFR (in gray) core segments (r.m.s.d. is  $\sim 1$  Å comparing 20 corresponding C $\alpha$  atoms). **d**, Analytical size-exclusion chromatography of ACR4<sup>WD40-CRD</sup> in the pre- or absence of Tris(2-carboxyethyl)phosphine (TCEP). Void (V<sub>0</sub>), total (V<sub>t</sub>), and elution volumes for molecular-mass standards (Al, Aldolase, 158 kDa; Co, Conalbumin, 75 kDa; Ov, Ovalbumin, 44 kDa; CA, Carbonic Anhydrase, 29 kDa; R, Ribonuclease A, 13.7 kDa; Ap, Aprotinin; 6.5 kDa) are indicated. **e**, SDS-PAGE analysis of fractions shown in d.

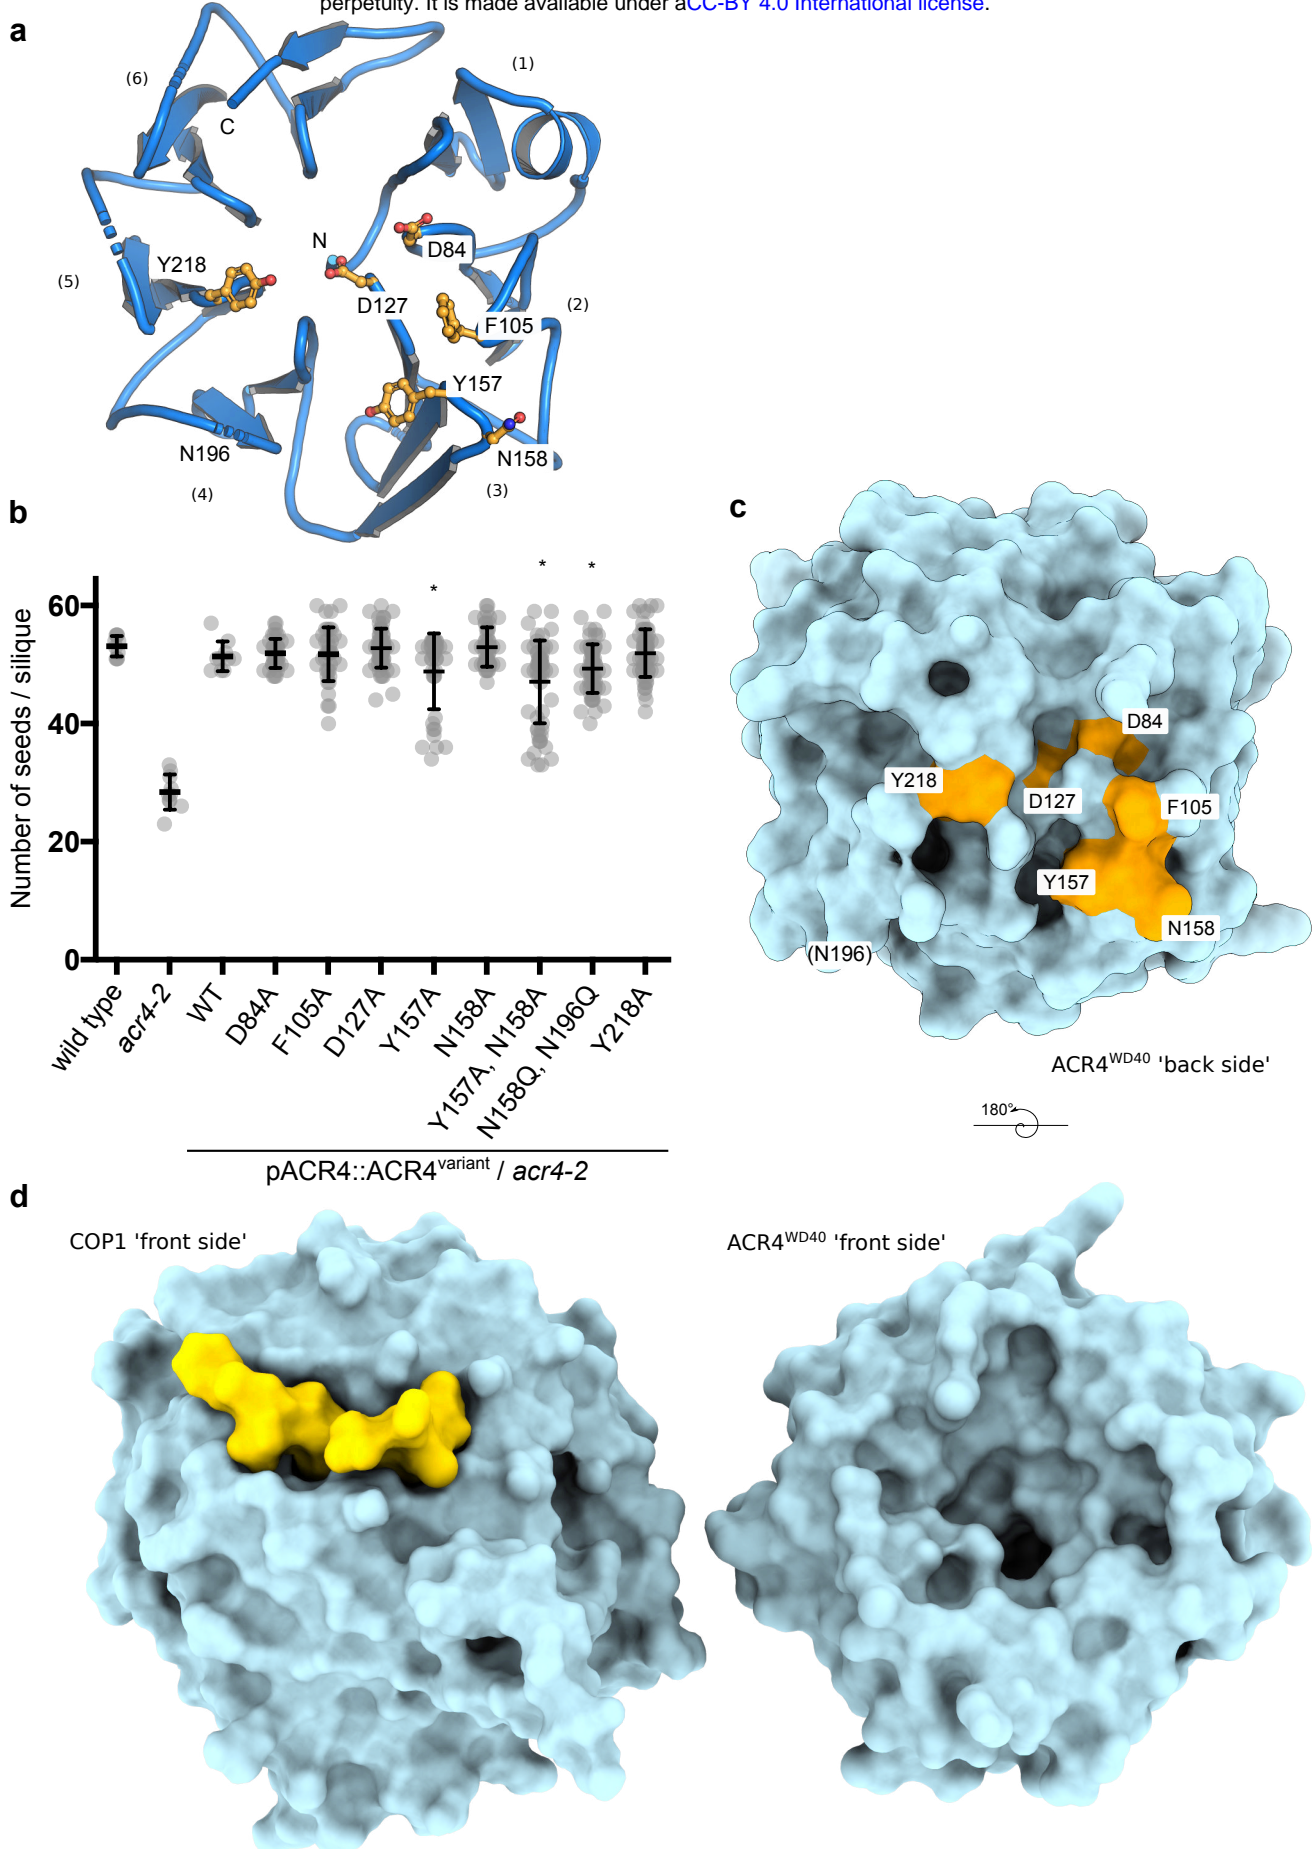

**Figure 4. The CRINKLY4 WD40 domain contains a putative ligand binding groove.**

**a**, Ribbon diagram of ACR4<sup>WD40</sup> (in blue) with surface exposed conserved residues shown in bonds representation (in orange) at the exposed surface. Blade numbers are indicated. **b**, Effect on surface point-mutations on ACR4-mediated seed production. Ten siliques per transgenic line from three independent homozygous T3 complementation lines were pooled and plotted as beeswarm plots with the bold line representing mean, whiskers indicating the standard deviation, and circles depicting the raw data. The plots for wild type, *acr4-2* and ACR4 were generated from same data sets shown in Fig. 3a. Seed counts per silique significantly different from wild type were determined by simultaneous comparisons of several mutants against wild type using the Dunnett procedure (indicated by an asterisk). **c**, Molecular surface of the ACR4<sup>WD40</sup>  $\beta$ -propeller domain 'back side' (in light blue). The positions of the mutated residues are highlighted in orange. **d**, Comparison of the 'front sides' of the structurally related WD40 domains of COP1 (PDB-ID 6QTO<sup>43</sup> left panel) and ACR4 (right panel, r.m.s.d is  $\sim 3.5$  comparing 205 corresponding C $\alpha$  atoms). The COP1 VP-peptide ligand derived from the transcription factor HY5 is shown in yellow. Note the large and deep putative binding groove in the corresponding surface area in ACR4<sup>WD40</sup>.



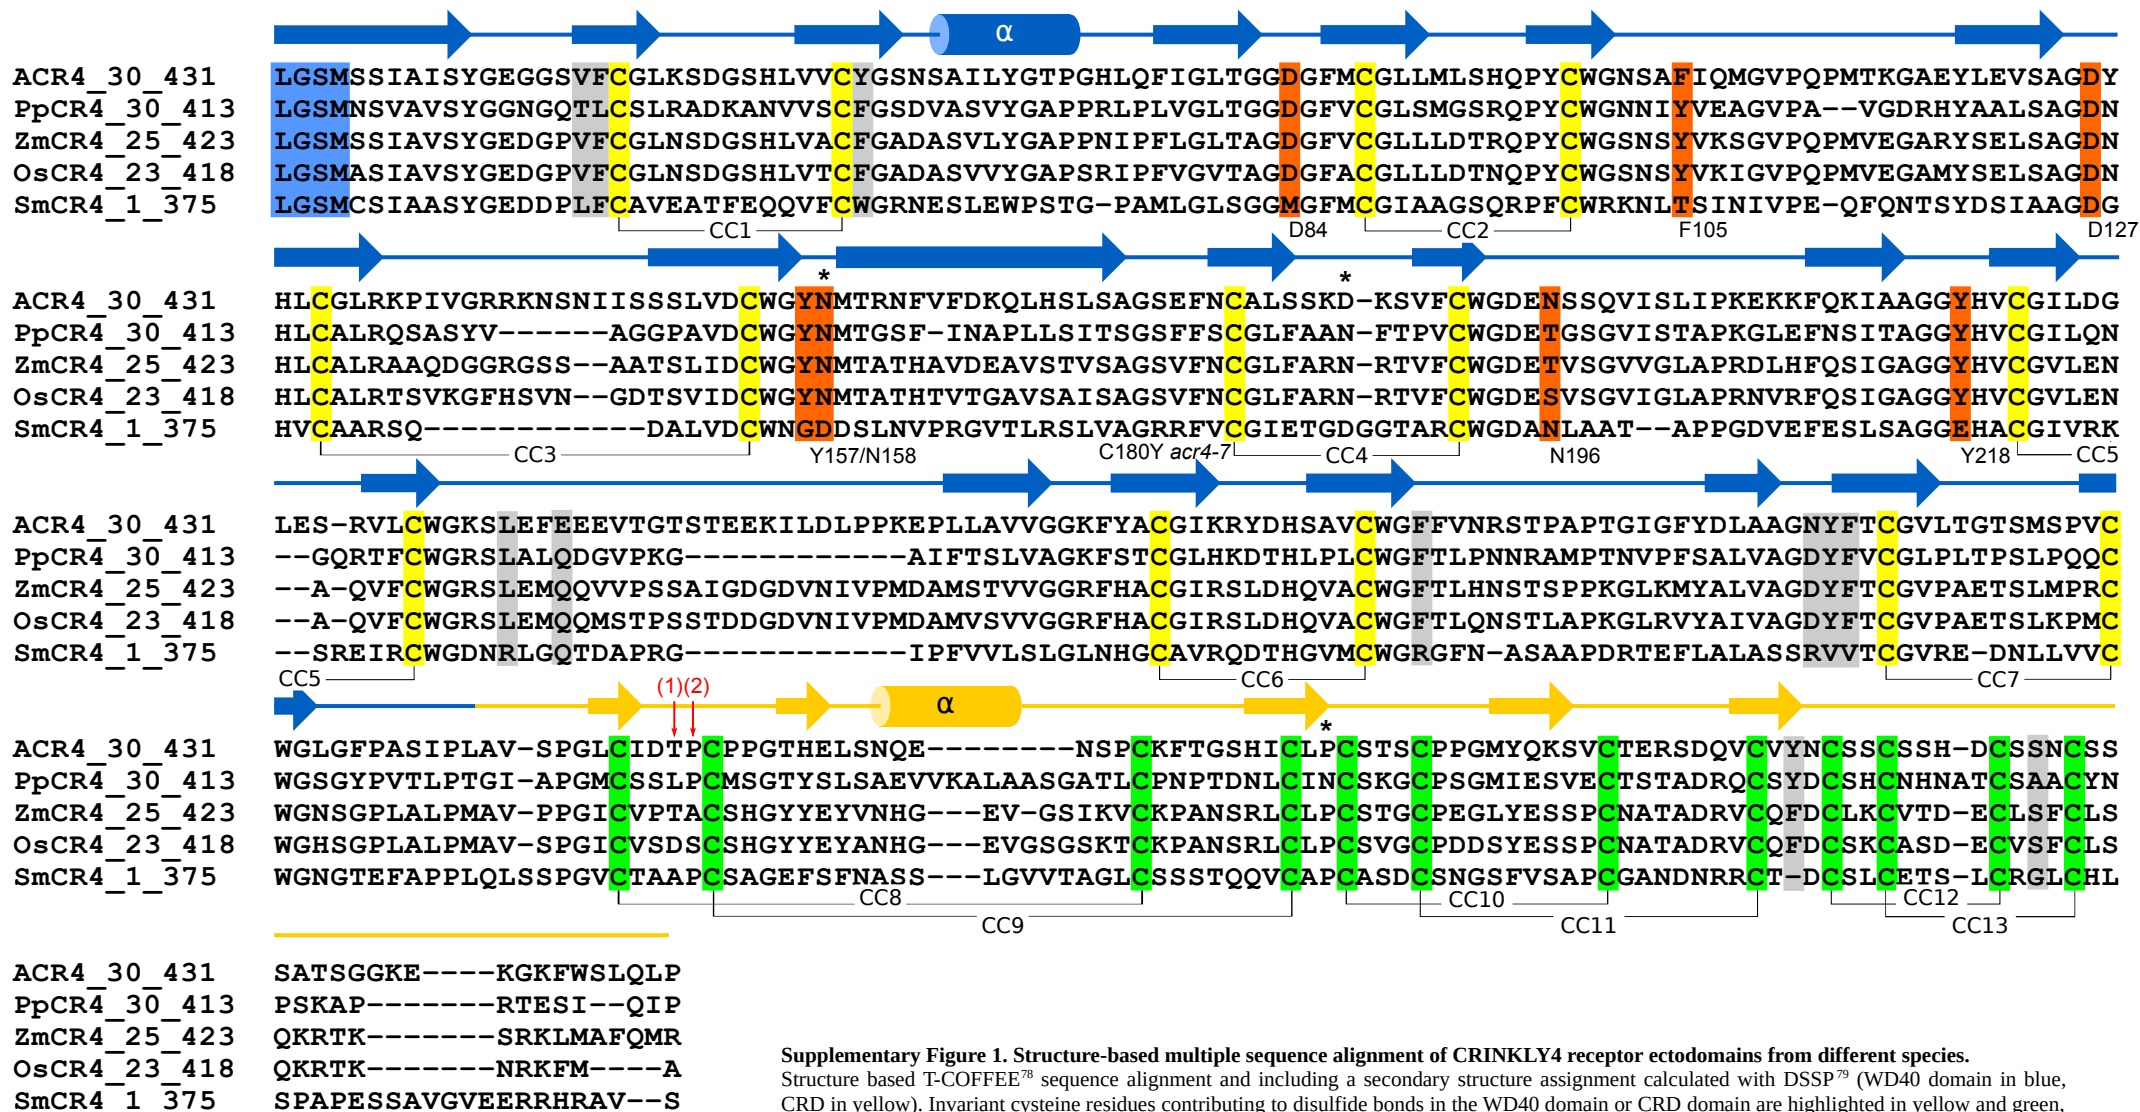

**Supplementary Figure 1. Structure-based multiple sequence alignment of CRINKLY4 receptor ectodomains from different species.** Structure based T-COFFEE<sup>76</sup> sequence alignment and including a secondary structure assignment calculated with DSSP<sup>79</sup> (WD40 domain in blue, CRD in yellow). Invariant cysteine residues contributing to disulfide bonds in the WD40 domain or CRD domain are highlighted in yellow and green, respectively. Residues analyzed with point mutations in this study are shown in orange. Conserved residues in the WD40 – CRD domain interface are depicted in gray. Asterisks denote the location of experimentally confirmed N-glycosylation sites. Red arrows represent domain boundaries for the TNFR/CRD deletion constructs in previous reports: (1)<sup>24</sup>, (2)<sup>20</sup>. ACR4 (*Arabidopsis thaliana*) UNIPROT-ID (<http://uniprot.org>) Q9LX29; PpCR4 (*Physcomitrella patens*) A9RKG8; ZmCR4 (*Zea mays*) O24585; OsCR4 (*Oryza sativa*) Q75J39; SmCR4 (*Selaginella moellendorffii*) D8T625. Note that the annotated SmCR4 sequence may be incomplete.

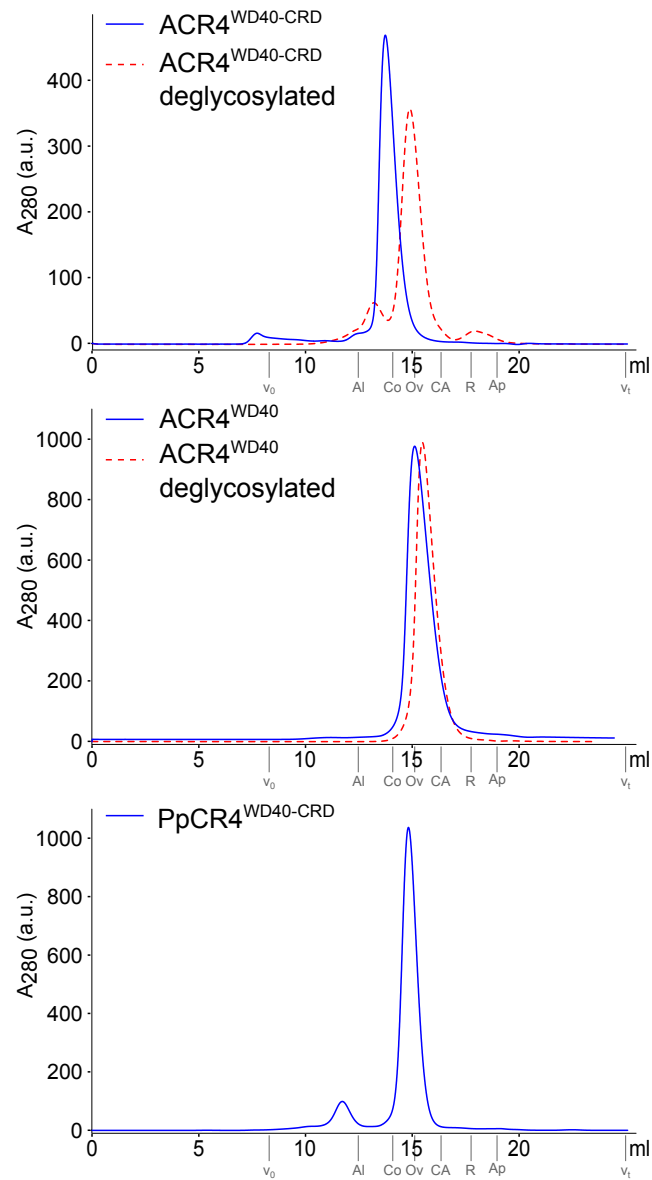

**Supplementary Figure 2. CRINKLY4 receptor ectodomains behave as monomers in solution.**

Analytical size-exclusion chromatography of the ACR4<sup>WD40-CRD</sup>, ACR4<sup>WD40</sup> and PpCR4<sup>WD40-CRD</sup> in the presence or absence of enzymatic deglycosylation. The void volume (V<sub>0</sub>), the total column volume (V<sub>t</sub>), and the elution volumes for molecular-mass standards (Al, Aldolase, 158 kDa; Co, Conalbumin, 75 kDa; Ov, Ovalbumin, 44 kDa; CA, Carbonic Anhydrase, 29 kDa; R, Ribonuclease A, 13.7 kDa; Ap, Aprotinin; 6.5 kDa) are indicated.

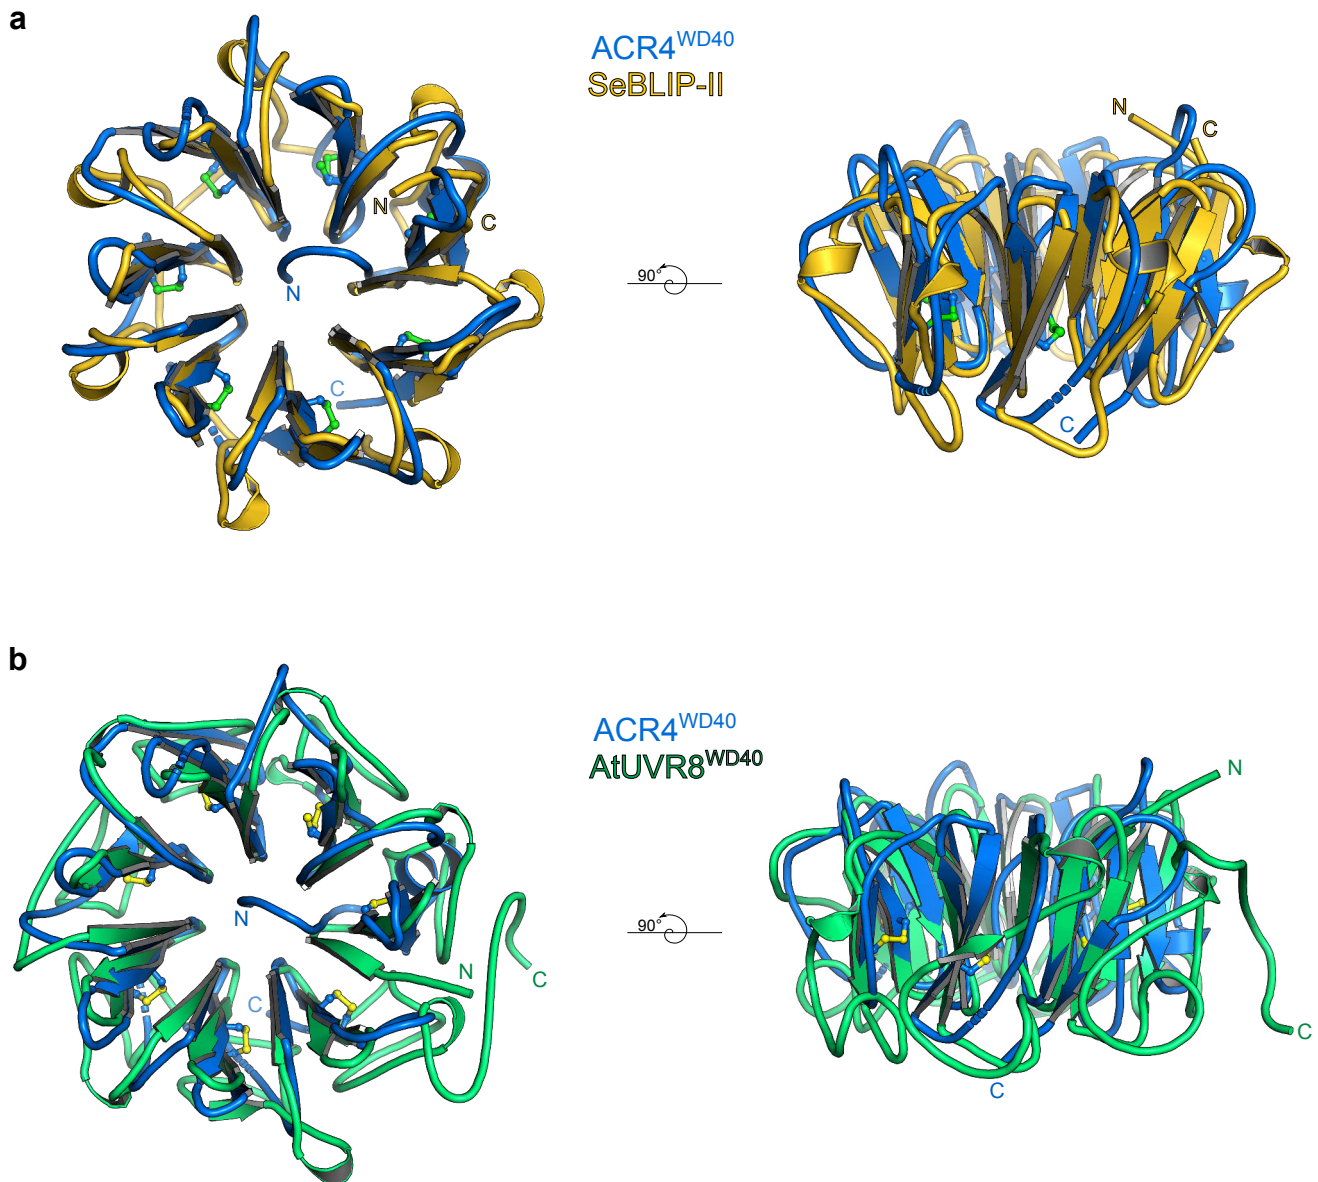

**Supplementary Figure 3. ACR4<sup>WD40</sup> shares structural features with known WD40 domains.**

Structural superposition of ACR4<sup>WD40</sup> (blue ribbon diagram) with **a**, the secreted  $\beta$ -lactamase inhibitor protein II BLIP-II (PDB-ID 1JTD<sup>39</sup>, in yellow) from the bacterium *Streptomyces exfoliatus* (r.m.s.d. is  $\sim 2.2$  Å comparing 192 corresponding C $_{\alpha}$  atoms), and **b**, with the WD40 domain of the UV-B photoreceptor UVR8 (PDB-ID 4D9S<sup>40</sup>, r.m.s.d. is  $\sim 2.4$  Å comparing 218 corresponding C $_{\alpha}$  atoms). Note that SeBLIP-II and UVR8 shares the blade number and overall architecture with ACR4<sup>WD40</sup>, but lack the buried N-terminal strand and the conserved disulfide bonds stabilizing each blade.

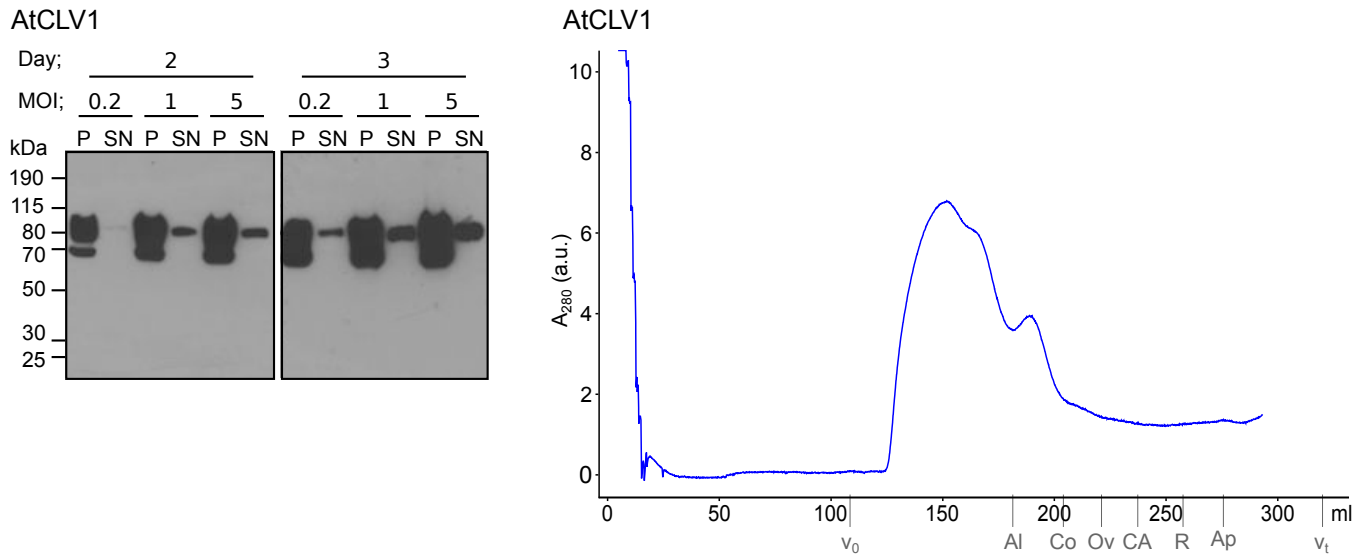

**Supplementary Figure 4. Expression and purification attempts of the AtCLV1 LRR ectodomain.**

Shown are immunoblot analyses monitoring the secreted expression of the AtCLV1 ectodomain (see Methods) with an anti-His antibody (left panels, Day, days post infection, MOI, multiplicity of infection; SN, supernatant; P, pellet). Right panel: Preparative size-exclusion chromatography of the purified AtCLV1 ectodomain reveals the presence of large aggregates. The void ( $V_0$ ), total ( $V_t$ ), and elution volumes for molecular-mass standards (Al, Aldolase, 158 kDa; Co, Conalbumin, 75 kDa; Ov, Ovalbumin, 44 kDa; CA, Carbonic Anhydrase, 29 kDa; R, Ribonuclease A, 13.7 kDa; Ap, Aprotinin; 6.5 kDa) are indicated.

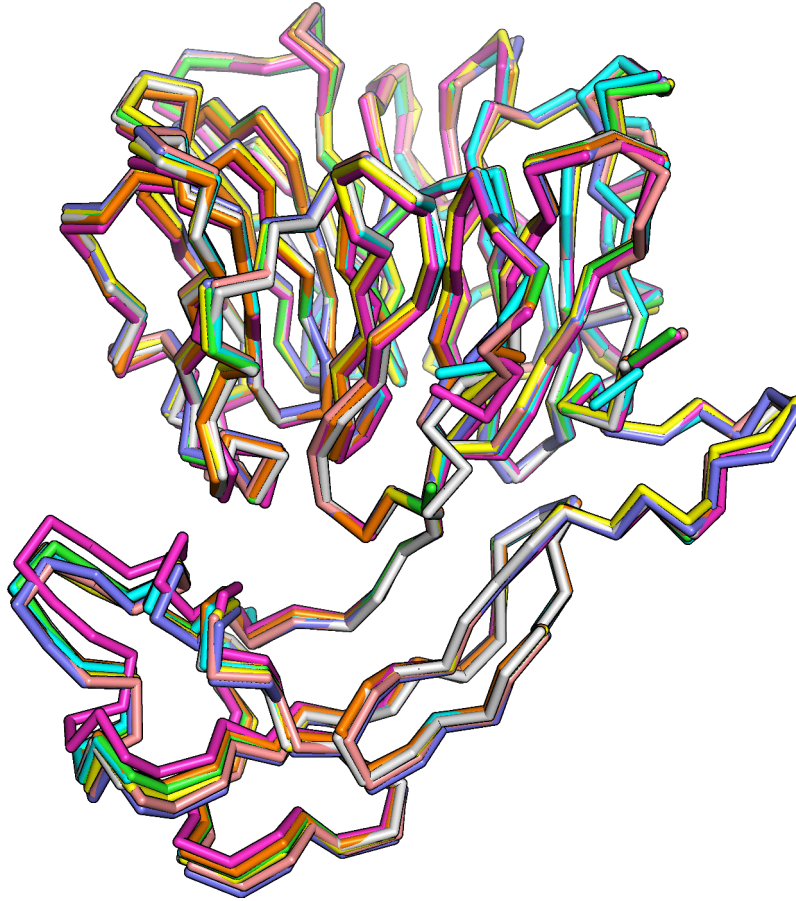

**Supplementary Figure 5. Only small WD40 - CRD inter-domain movements can be observed in the PpCR4 crystal structure.**

Structural superposition of the eight molecules located in the asymmetric unit of the PpCR4<sup>WD40-CRD</sup> crystal structure (r.m.s.d. is ~0.3-0.5 Å comparing 360 corresponding C<sub>α</sub> atoms). Individual molecules are shown in different colors as C<sub>α</sub> traces.

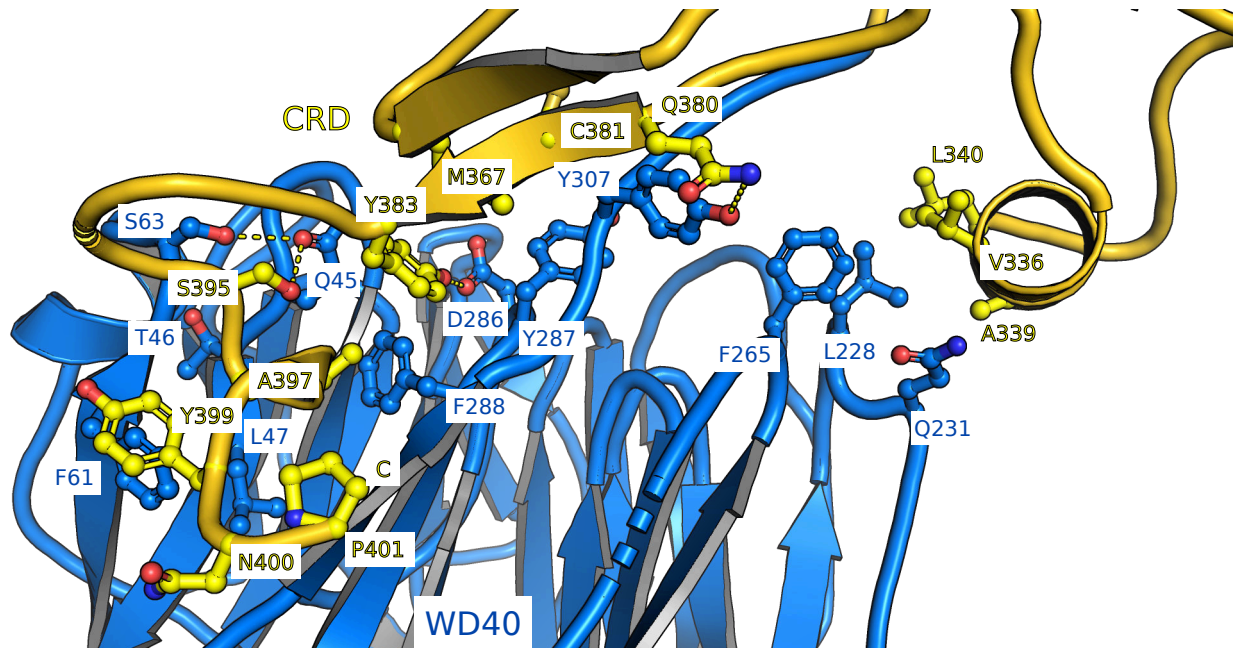

**Supplementary Figure 6. Overview of the WD40 – CRD domain interface in the PpCRD<sup>WD40-CRD</sup> structure.**

Shown is a ribbon diagram of the PpCR4 ectodomain (colored according to Fig. 1e) with selected interface residues shown in bonds representation. Hydrogen bonds and salt bridges are indicated by dotted lines.

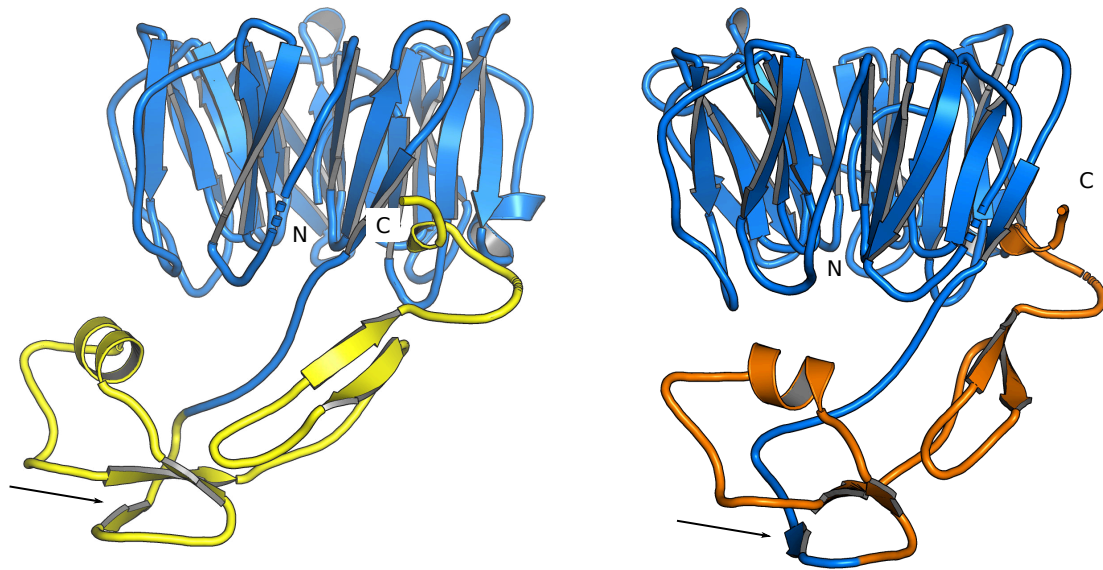

**Supplementary Figure 7. Structural visualization of the TNFR/CRD domain boundaries used in this and in previous studies.**

Ribbon diagram of PpCR4<sup>WD40-CRD</sup> with the WD40 domain shown in blue and the experimentally determined CRD domain boundaries shown in yellow (left panel). The previously used TNFR domain boundaries<sup>20,24</sup> derived from sequence analysis (in orange) omit the most N-terminal  $\beta$ -strand in the CRD (in blue, indicated by a black arrow).

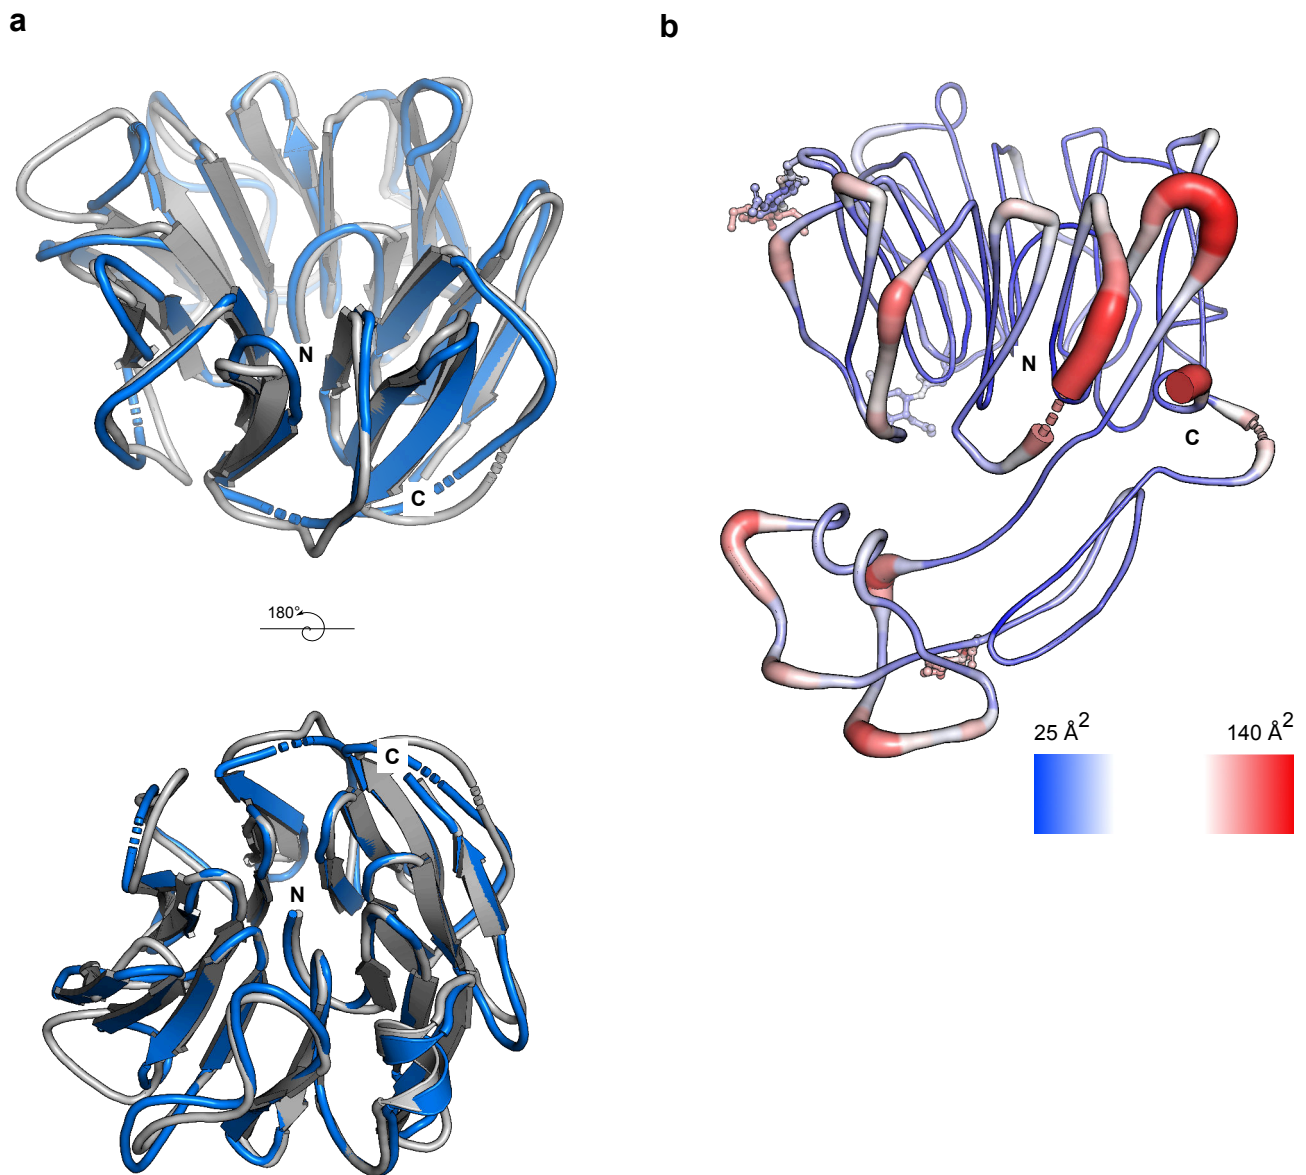

**Supplementary Figure 8. Structurally conserved loop regions contribute to the formation of a putative ligand binding groove in CRINKLY4 WD40 domains.**

**a**, Structural superposition of the isolated WD40 domain from ACR4 (blue) and PpCR4 (light gray, r.m.s.d. is  $\sim 1.4$  Å comparing 246 corresponding  $C_{\alpha}$  atoms) reveals the loop regions contributing to the formation of a putative ligand binding groove to adopt similar orientations in both structures. **b**, A temperature (B-) factor plot of PpCR4<sup>WD40-CRD</sup> (molecule chain A) reveals little structural flexibility for the secondary structure elements forming part of the putative binding groove, while the partially disordered loops connecting the blades of the  $\beta$ -propeller and the loops connecting the CRD appear mobile in the PpCR4<sup>WD40-CRD</sup> crystal structure.
